# Supplementary material for: Ductile-to-brittle transition and materials’ resistance to amorphization by irradiation damage
Source: Royal Society of Chemistry journal article supplement (doi:10.1039/c6ra05194d), 2016-01-01
Supplement: c6ra05194d1.pdf [file c6ra05194d1.pdf]

**Supporting materials**

Correspondence and requests for materials should be addressed to X.W.(wangxin@alum.imr.ac.cn) and P.-C.Z.(zpc113@sohu.com)

**Ductile-to-brittle transition and materials' resistance to amorphization by irradiation damage**

Xin Wang<sup>1,2</sup>, Yuting Zhang<sup>1</sup>, Pengchuang Liu<sup>1</sup>, Jiawei Yan<sup>3</sup>, Wenlin Mo<sup>3</sup>, Pengcheng Zhang<sup>1</sup> & Xingqiu Chen<sup>2</sup>

1. Science and Technology on Surface Physics and Chemistry Laboratory, P.O. Box:9-35, Huafengxincun, Jiangyou, Sichuan, 621908, P.R. China

2. Shenyang National Laboratory for Materials Science, Institute of Metal Research, Chinese Academy of Science, Wenhua Road No.72, Shenhe District, Shenyang, Liaoning, 110016, P.R. China

3. Institute of Materials, Chinese Academy of Engineering Physics, P.O.Box:No.9, Huafengxincun, Jiangyou, Sichuan, 621907, China

\* The shear and bulk moduli are calculated within Voigt approximation. MD represents molecular dynamics. Expt reveals that this data is from experimental findings on single crystal. Calc suggest that this data is from calculations based on DFT. EMTO is the abbreviation of exact muffin-tin orbitals (EMTO) method.

TABLE I: The calculated lattice parameters (in Å) and elastic properties (in GPa) of typical fcc and bcc metals, as well as experimental results.

|                                  | a      | C <sub>11</sub> | C <sub>12</sub> | C <sub>44</sub> | G     | B     | $\nu$  | G/B    | Cauchy Pressure/B | Note                    |
|----------------------------------|--------|-----------------|-----------------|-----------------|-------|-------|--------|--------|-------------------|-------------------------|
| fcc-Zr                           | 4.52   | -               | -               | 53              |       |       |        |        |                   | FPLAPW <sup>1</sup>     |
| fcc-Zr                           | 4.527  | 115             | 78              | 48              | 33    | 90    | 0.3373 | 0.3649 | 0.3270            | This work               |
| fcc-Al                           | 4.04   | 114.3           | 61.92           | 31.62           | 29    | 79    | 0.3355 | 0.3694 | 0.3817            | Expt <sup>2</sup>       |
| fcc-Al                           | 4.038  | 105.3           | 65.1            | 31              | 26    | 79    | 0.3506 | 0.3319 | 0.4343            | This work               |
| fcc-Au                           | 4.079  | 192.3           | 163.1           | 42              | 28    | 173   | 0.4244 | 0.1592 | 0.7007            | Expt(300K) <sup>3</sup> |
| fcc-Au                           | 4.173  | 141             | 133             | 30              | 24    | 185   | 0.4376 | 0.1301 | 0.7545            | This work               |
| fcc-Cu                           | -      | 171.0           | 123.9           | 75.6            | 48    | 140   | 0.3458 | 0.3438 | 0.3444            | Expt <sup>4</sup>       |
| fcc-Cu                           | 3.635  | 178             | 145             | 69              | 39    | 156   | 0.3847 | 0.2499 | 0.4876            | This work               |
| fcc-Ir                           | 3.877  | 582.1           | 230.3           | 252             | 218   | 348   | 0.2404 | 0.6279 | -0.0627           | This work               |
| fcc-Ir                           | 3.829  | 596             | 252             | 270             | 225   | 367   | 0.2450 | 0.6146 | -0.0491           | Calc <sup>5</sup>       |
| fcc-Ir                           | -      | 580             | 242             | 256             | 225   | 367   | 0.2450 | 0.6146 | -0.0491           | Expt <sup>6</sup>       |
| fcc-Ag                           | -      | 124             | 93.4            | 46.1            | 30    | 104   | 0.3693 | 0.2863 | 0.4566            | Expt <sup>6</sup>       |
| fcc-Ag                           | -      | 115.8           | 89              | 40.7            | 26    | 98    | 0.3776 | 0.2665 | 0.4932            | Calc <sup>6</sup>       |
| fcc-Pd                           | -      | 227.1           | 176             | 71.73           | 47    | 193   | 0.3864 | 0.2458 | 0.5402            | Expt <sup>6</sup>       |
| fcc-Pd                           | -      | 198.1           | 149.7           | 55.2            | 40    | 166   | 0.3893 | 0.2391 | 0.5698            | This work               |
| fcc-Pt                           | -      | 346.7           | 250.7           | 76.5            | 63    | 283   | 0.3956 | 0.2244 | 0.6162            | Expt <sup>6</sup>       |
| fcc-Pt                           | -      | 289.9           | 224.9           | 45.9            | 40    | 247   | 0.4231 | 0.1620 | 0.7261            | This work               |
| fcc-Ni                           | -      | 243.6           | 149.4           | 119.6           | 82    | 181   | 0.3024 | 0.4553 | 0.1648            | Expt <sup>6</sup>       |
| fcc-Ni                           | -      | 268.2           | 159.7           | 130.2           | 92    | 196   | 0.2976 | 0.4679 | 0.1505            | This work               |
| bcc-Mo                           | 3.150  | 496             | 159             | 107             | 125   | 265   | 0.2958 | 0.4729 | 0.1974            | This work               |
| bcc-Mo                           | -      | 464.7           | 161.5           | 109             | 124   | 263   | 0.2955 | 0.4736 | 0.2003            | Expt <sup>7</sup>       |
| bcc-Nb                           | 3.322  | 238             | 143             | 14              | 24    | 174   | 0.4346 | 0.1368 | 0.7350            | This work               |
| bcc-Nb                           | -      | 246.6           | 133.2           | 28.1            | 37    | 171   | 0.3981 | 0.2185 | 0.6146            | Expt <sup>7</sup>       |
| bcc-Fe                           | 2.870  | 239.55          | 135.75          | 120.75          | 86    | 170   | 0.2838 | 0.5051 | 0.0881            | Expt <sup>8</sup>       |
| bcc-Ta                           | 3.30   | 266.32          | 158.16          | 87.36           | 72    | 194   | 0.3349 | 0.3711 | 0.3645            | Expt <sup>8</sup>       |
| bcc-W                            | 3.16   | 532.55          | 204.95          | 163.13          | 163   | 314   | 0.2784 | 0.5200 | 0.1333            | Expt <sup>8</sup>       |
| bcc-W                            | -      | 516.6           | 199.7           | 146.7           | 151   | 305   | 0.2874 | 0.4955 | 0.1736            | This work               |
| bcc-V                            | 3.03   | 232.4           | 119.36          | 45.95           | 50    | 157   | 0.3562 | 0.3180 | 0.4673            | Expt <sup>8</sup>       |
| bcc-Cr                           | -      | 394.1           | 88.5            | 103.75          | 121.2 | 190.4 | 0.2374 | 0.6367 | -0.0801           | OK <sup>9</sup>         |
| bcc-Cr                           | -      | 424.9           | 54.5            | 97.4            | 126   | 178   | 0.2130 | 0.7099 | -0.2410           | This work               |
| bcc-Li                           | 3.439  | 15.1            | 13.4            | 12.7            | 7.9   | 13.9  |        | 0.5683 | 0.0493            | This work*              |
| bcc-Li                           | 3.471  | -               | -               | 11.7            |       | 14.1  |        |        |                   | Calc <sup>10</sup>      |
| bcc-Na                           | 4.193  | 8.7             | 7.4             | 6.8             | 4.33  | 7.87  |        | 0.5502 | 0.0829            | This work*              |
| bcc-Na                           | 4.200  | -               | -               | 6.3             |       | 7.67  |        |        |                   | Calc <sup>10</sup>      |
| bcc-K                            | 4.166  | 4.5             | 4.0             | 2.9             | 1.8   | 4.2   |        | 0.4286 | 0.2706            | This work*              |
| bcc-K                            | -      | -               | -               | 2.9             |       | 3.77  |        |        |                   | Calc <sup>10</sup>      |
| bcc-Rb                           | -      | -               | -               | 2.2             |       | 3.17  |        |        |                   | Calc <sup>10</sup>      |
| bcc-Rb                           | -      | 3.1             | 2.7             | 2.1             | 1.33  | 2.8   |        | 0.4750 | 0.2200            | This work*              |
| bcc-Cs                           | -      | -               | -               | 1.61            | 2.32  |       |        |        |                   | Calc <sup>10</sup>      |
| Diamond-C                        | 3.567  | 1079            | 124             | 578             | 535   | 442   | 0.069  | 1.2105 | -1.0263           | Expt <sup>11</sup>      |
| Diamond-C                        | 3.557  | -               | -               | 534             |       |       |        |        |                   | LCAO <sup>12</sup>      |
| Diamond-C                        | 3.572  | 1051.4          | 125.9           | 560             | 519   | 434   | 0.073  | 1.195  | -1.000            | This work               |
| Diamond-Si                       | 5.4309 | -               | -               | -               |       |       |        |        |                   | Expt <sup>13</sup>      |
| Diamond-Si                       | 5.4345 | -               | -               | -               |       |       |        |        |                   | PBE-HSE                 |
| Diamond-Si                       | 5.468  | 153.3           | 56.8            | 75              | 63    | 89    | 0.2150 | 0.7038 | -0.1996           | This work               |
| SiC                              | 4.3596 | 390             | 142             | 256             | 191   | 225   | 0.1683 | 0.8518 | -0.5074           | Expt <sup>14</sup>      |
| SiC                              | 4.315  | 420             | 126             | 287             | 219   | 224   | 0.1308 | 0.9795 | -0.7188           | Calc <sup>15</sup>      |
| SiC                              | -      | 383             | 126.6           | 240.2           | 187   | 212   | 0.1597 | 0.8803 | -0.5355           | This work               |
| AlN                              | 4.38   | 328             | 139             | 133             | 116   | 202   | 0.2590 | 0.5742 | 0.0297            | Calc <sup>16</sup>      |
| GaN                              | 4.54   | 264             | 153             | 68              | 63    | 190   | 0.3514 | 0.3299 | 0.4474            | Calc <sup>16</sup>      |
| InN                              | 5.03   | 172             | 119             | 37              | 32    | 137   | 0.3902 | 0.2368 | 0.6000            | Calc <sup>16</sup>      |
| Si <sub>3</sub> N <sub>4</sub>   | -      | 532.6           | 191.2           | 341.0           | 258   | 305   | 0.1698 | 0.8469 | -0.4911           | Calc <sup>17</sup>      |
| Ge <sub>3</sub> N <sub>4</sub>   | -      | 395.1           | 165.4           | 234.5           | 176   | 242   | 0.2072 | 0.7277 | -0.2856           | Calc <sup>17</sup>      |
| Nb <sub>3</sub> Sn               | -      | 282.4           | 110.1           | 53.8            | 65    | 168   | 0.3282 | 0.3881 | 0.3361            | Calc <sup>18</sup>      |
| TiN                              | -      | 671.01          | 106.4           | 166.22          | 206   | 295   | 0.2167 | 0.6985 | -0.2030           | Calc <sup>19</sup>      |
| TiN                              | -      | 625             | 165             | 163             | 187   | 318   | 0.2542 | 0.5879 | 0.0006            | Expt <sup>19</sup>      |
| TiCrN                            | -      | 649.35          | 123.9           | 160.22          | 196   | 299   | 0.2316 | 0.6538 | -0.1214           | Calc <sup>19</sup>      |
| TiZrN                            | -      | 593.89          | 85.07           | 147.15          | 183   | 255   | 0.2095 | 0.7206 | -0.2436           | Calc <sup>19</sup>      |
| TiNbN                            | -      | 591.76          | 102.85          | 146.58          | 180   | 266   | 0.2236 | 0.6775 | -0.1644           | Calc <sup>19</sup>      |
| TiVN                             | -      | 574.78          | 123.94          | 159.18          | 183   | 274   | 0.2270 | 0.6676 | -0.1287           | Calc <sup>19</sup>      |
| TiWN                             | -      | 574.01          | 154.7           | 134.12          | 161   | 294   | 0.2694 | 0.5451 | 0.0700            | Calc <sup>19</sup>      |
| TiMoN                            | -      | 573.33          | 191.23          | 145.09          | 162   | 319   | 0.2827 | 0.5084 | 0.1450            | Calc <sup>19</sup>      |
| TiAlN                            | -      | 503.87          | 143.05          | 174.01          | 177   | 263   | 0.2261 | 0.6703 | -0.1173           | Calc <sup>19</sup>      |
| Zr <sub>3</sub> Al               | -      | 146.45          | 74.27           | 75.67           | 56    | 98    | 0.2599 | 0.5717 | -0.0142           | Calc <sup>20</sup>      |
| PdZr(Pm-3m)                      | -      | 152.9           | 141.3           | 34.1            | 17    | 145   | 0.4431 | 0.1183 | 0.7385            | Calc <sup>21</sup>      |
| MgAl <sub>2</sub> O <sub>4</sub> | -      | 266.2           | 148.0           | 148.6           | 103   | 187   | 0.2684 | 0.5479 | -0.0032           | Calc <sup>17</sup>      |
| MgAl <sub>2</sub> O <sub>4</sub> | -      | 282.9           | 154.8           | 155.4           | 109   | 198   | 0.2671 | 0.5514 | -0.0030           | Expt <sup>17</sup>      |
| Mg <sub>2</sub> SiO <sub>4</sub> | -      | 333.7           | 111.0           | 140.0           | 128   | 185   | 0.2196 | 0.6896 | -0.1566           | Calc <sup>17</sup>      |
| Mg <sub>2</sub> SiO <sub>4</sub> | -      | 327.0           | 126.0           | 112.0           | 107   | 193   | 0.2656 | 0.5557 | 0.0725            | Expt <sup>17</sup>      |

TABLE II: The calculated lattice parameters (in Å) and elastic properties (in GPa) of cubic structures, as well as experimental results(continued)

|           | a     | C <sub>11</sub> | C <sub>12</sub> | C <sub>44</sub> | G     | B     | $\nu$  | G/B    | Cauchy Pressure/B | Note                |
|-----------|-------|-----------------|-----------------|-----------------|-------|-------|--------|--------|-------------------|---------------------|
| NaCl      | -     | 51.6            | 12.2            | 13.6            | 16    | 25    | 0.2421 | 0.6229 | -0.0553           | Expt <sup>22</sup>  |
| NaCl      | -     | 49.11           | 12.25           | 12.84           | 15    | 25    | 0.2483 | 0.6050 | -0.0240           | Expt <sup>4</sup>   |
| NaCl      | 5.653 | 48.97           | 11.87           | 12.31           | 15    | 24    | 0.2504 | 0.5988 | -0.0181           | This work           |
| NaCl      | -     | 57.33           | 11.23           | 13.31           | 16.6  | 26.6  | 0.2415 | 0.6246 | -0.0782           | 4.2K <sup>23</sup>  |
| NaCl      | -     | 56.48           | 11.42           | 13.30           | 16.4  | 26.4  | 0.2424 | 0.6221 | -0.0711           | 80K <sup>23</sup>   |
| NaCl      | -     | 50.45           | 12.99           | 12.95           | 15.0  | 25.5  | 0.2537 | 0.5895 | 0.0016            | 240K <sup>23</sup>  |
| NaCl      | -     | 49.85           | 13.05           | 12.85           | 14.8  | 25.3  | 0.2548 | 0.5862 | 0.0079            | 260K <sup>23</sup>  |
| NaCl      | -     | 49.27           | 13.08           | 12.75           | 14.7  | 25.1  | 0.2557 | 0.5836 | 0.0131            | 280K <sup>23</sup>  |
| NaCl      | -     | 48.70           | 13.11           | 12.66           | 14.5  | 25.0  | 0.2566 | 0.5811 | 0.0180            | 300K <sup>23</sup>  |
| NaCl      | -     | 49.5            | 13.2            | 12.79           | 14.7  | 25.3  | 0.2564 | 0.5818 | 0.0162            | 300K <sup>24</sup>  |
| NaCl      | -     | 47.6            | 13.3            | 12.62           | 14.3  | 24.7  | 0.2580 | 0.5770 | 0.0275            | 350K <sup>24</sup>  |
| NaCl      | -     | 44.1            | 13.5            | 12.26           | 13.4  | 23.7  | 0.2622 | 0.5653 | 0.0523            | 450K <sup>24</sup>  |
| NaCl      | -     | 40.5            | 13.5            | 11.90           | 12.5  | 22.5  | 0.2654 | 0.5563 | 0.0711            | 550K <sup>24</sup>  |
| NaCl      | -     | 37.0            | 13.1            | 11.52           | 11.7  | 21.1  | 0.2659 | 0.5549 | 0.0750            | 650K <sup>24</sup>  |
| NaCl      | -     | 33.7            | 12.9            | 11.10           | 10.8  | 19.8  | 0.2693 | 0.5453 | 0.0908            | 750K <sup>24</sup>  |
| NaF       | -     | 108.5           | 22.9            | 28.99           | 34.5  | 51.4  | 0.2298 | 0.6591 | -0.1184           | 4.2K* <sup>23</sup> |
| NaF       | -     | 107.1           | 23.12           | 28.97           | 34.2  | 51.1  | 0.2302 | 0.6579 | -0.1145           | 80K* <sup>23</sup>  |
| NaF       | -     | 98.62           | 24.28           | 28.19           | 31.7  | 49.1  | 0.2356 | 0.6419 | -0.0797           | 260K* <sup>23</sup> |
| NaF       | -     | 98.07           | 24.36           | 28.13           | 31.3  | 48.9  | 0.2360 | 0.6406 | -0.0770           | 270K <sup>23</sup>  |
| NaF       | -     | 97.49           | 24.44           | 28.07           | 31.45 | 48.79 | 0.2365 | 0.6393 | -0.0744           | 280K* <sup>23</sup> |
| NaF       | -     | 96.90           | 24.52           | 28.01           | 31.0  | 48.6  | 0.2369 | 0.6380 | -0.0717           | 290K <sup>23</sup>  |
| NaF       | -     | 96.3            | 24.59           | 27.94           | 30.9  | 48.5  | 0.2374 | 0.6367 | -0.0691           | 300K <sup>23</sup>  |
| NaBr      | -     | 48.0            | 9.86            | 10.7            | 14.0  | 22.6  | 0.2504 | 0.5986 | -0.0372           | 4.2K* <sup>23</sup> |
| NaBr      | -     | 46.45           | 9.88            | 10.6            | 13.7  | 22.1  | 0.2505 | 0.5985 | -0.0326           | 80K* <sup>23</sup>  |
| NaBr      | -     | 41.53           | 9.95            | 10.17           | 12.4  | 20.5  | 0.2525 | 0.5928 | -0.0107           | 240K* <sup>23</sup> |
| NaBr      | -     | 40.92           | 9.97            | 10.11           | 12.3  | 20.3  | 0.2530 | 0.5914 | -0.0069           | 260K* <sup>23</sup> |
| NaBr      | -     | 40.31           | 9.99            | 10.05           | 12.1  | 20.1  | 0.2535 | 0.5899 | -0.0030           | 280K* <sup>23</sup> |
| NaBr      | -     | 39.70           | 10.01           | 9.98            | 11.9  | 19.9  | 0.2542 | 0.5880 | -0.0015           | 300K* <sup>23</sup> |
| RbBr      | -     | 38.63           | 4.74            | 4.085           | 9.2   | 16.0  | 0.2583 | 0.5762 | 0.0408            | 4.2K* <sup>23</sup> |
| RbBr      | -     | 38.53           | 4.74            | 4.083           | 9.2   | 16.0  | 0.2586 | 0.5755 | 0.0411            | 20K* <sup>23</sup>  |
| RbBr      | -     | 38.2            | 4.74            | 4.076           | 9.14  | 15.9  | 0.2588 | 0.5749 | 0.0418            | 40K* <sup>23</sup>  |
| RbBr      | -     | 37.75           | 4.74            | 4.068           | 9.04  | 15.7  | 0.2590 | 0.5744 | 0.0427            | 60K <sup>23</sup>   |
| RbBr      | -     | 37.25           | 4.74            | 4.05            | 8.9   | 15.6  | 0.2593 | 0.5734 | 0.0443            | 80K* <sup>23</sup>  |
| RbBr      | -     | 31.35           | 5.12            | 3.77            | 7.51  | 13.9  | 0.2705 | 0.5418 | 0.0971            | 290K* <sup>23</sup> |
| RbBr      | -     | 31.07           | 5.15            | 3.76            | 7.44  | 13.8  | 0.2714 | 0.5395 | 0.1007            | 300K* <sup>23</sup> |
| KCl       | -     | 40.95           | 7.05            | 6.30            | 9     | 18    | 0.2795 | 0.5169 | 0.0409            | Expt <sup>4</sup>   |
| KCl       | 6.364 | 38.7            | 6.9             | 6.5             | 9     | 18    | 0.2734 | 0.5338 | 0.0269            | This work           |
| KCl       | -     | 40.1            | 5.45            | 6.35            | 10.7  | 17.0  | 0.2391 | 0.6318 | -0.0530           | 300K <sup>25</sup>  |
| KCl       | -     | 36.9            | 5.40            | 6.21            | 10.0  | 15.9  | 0.2396 | 0.6302 | -0.0509           | 400K <sup>25</sup>  |
| KCl       | -     | 33.8            | 5.15            | 6.11            | 9.40  | 14.7  | 0.2364 | 0.6395 | -0.0653           | 500K <sup>25</sup>  |
| KCl       | -     | 31.1            | 5.0             | 5.96            | 8.8   | 13.7  | 0.2355 | 0.6423 | -0.0700           | 600K <sup>25</sup>  |
| KCl       | -     | 28.2            | 4.8             | 5.79            | 8.2   | 12.6  | 0.2339 | 0.6468 | -0.0786           | 700K <sup>25</sup>  |
| KCl       | -     | 25.5            | 4.5             | 5.57            | 7.5   | 11.5  | 0.2321 | 0.6522 | -0.0930           | 800K <sup>25</sup>  |
| KCl       | -     | 23.5            | 4.6             | 5.57            | 7.1   | 10.9  | 0.2324 | 0.6514 | -0.0890           | 850K <sup>25</sup>  |
| LiI       | 6.013 | 33.7            | 13.1            | 13.9            | 12    | 20    | 0.2443 | 0.6164 | -0.0381           | This work           |
| LiCl      | -     | 49.27           | 23.1            | 24.95           | 19    | 32    | 0.2482 | 0.6051 | -0.0581           | Expt <sup>23</sup>  |
| LiCl      | -     | 51.8            | 21.9            | 23.6            | 20    | 32    | 0.2441 | 0.6171 | -0.0545           | This work           |
| NaF       | -     | 96.9            | 24.5            | 28.01           | 31    | 49    | 0.2368 | 0.6383 | -0.0722           | Expt <sup>23</sup>  |
| NaF       | -     | 127.4           | 25.6            | 33              | 39    | 60    | 0.2294 | 0.6604 | -0.1252           | This work           |
| NaBr      | -     | 40.0            | 10.0            | 10.02           | 12    | 20    | 0.2538 | 0.5892 | -0.0009           | Expt <sup>23</sup>  |
| KF        | -     | 64.9            | 15.2            | 12.32           | 16    | 32    | 0.2800 | 0.5157 | 0.0907            | Expt <sup>23</sup>  |
| RbCl      | -     | 36.46           | 6.47            | 4.68            | 7.6   | 16.4  | 0.2993 | 0.4634 | 0.1087            | Expt <sup>23</sup>  |
| RbBr      | -     | 31.35           | 5.12            | 3.774           | 6.4   | 13.9  | 0.3001 | 0.4612 | 0.0971            | Expt <sup>23</sup>  |
| RbI       | -     | 25.75           | 3.4             | 2.778           | 5.1   | 10.9  | 0.2984 | 0.4658 | 0.0573            | Expt <sup>23</sup>  |
| NaH(NaCl) | -     | 47.3            | 2.5             | 22.5            | 22.5  | 17.4  | 0.0494 | 1.288  | -1.147            | Expt <sup>26</sup>  |
| NaH(NaCl) | -     | 59.1            | 9.2             | 22.02           | 23.1  | 25.8  | 0.1550 | 0.8961 | -0.4963           | GGA <sup>26</sup>   |
| NaH(CsCl) | -     | 73.02           | 11.9            | 30.11           | 30.3  | 32.3  | 0.1426 | 0.9385 | -0.5642           | GGA <sup>26</sup>   |
| RbH(NaCl) | -     | 26.46           | 7.93            | 10.97           | 10.3  | 14.1  | 0.2072 | 0.7277 | -0.2157           | GGA <sup>26</sup>   |
| RbH(CsCl) | -     | 42.0            | 1.4             | 12.0            | 14.8  | 14.9  | 0.1269 | 0.9933 | -0.7098           | GGA <sup>26</sup>   |
| RbH(NaCl) | -     | 26.46           | 7.93            | 10.97           | 10.3  | 14.1  | 0.2072 | 0.7277 | -0.2157           | GGA <sup>26</sup>   |
| RbH(CsCl) | -     | 42.0            | 1.4             | 12.0            | 14.8  | 14.9  | 0.1269 | 0.9933 | -0.7098           | GGA <sup>26</sup>   |
| LiH(NaCl) | -     | 66.4            | 15.6            | 45.8            | 36.2  | 32.5  | 0.0946 | 1.1112 | -0.9283           | Expt <sup>26</sup>  |
| LiH(NaCl) | -     | 84.7            | 14.0            | 48.9            | 42.9  | 37.6  | 0.0863 | 1.1423 | -0.9287           | this work           |
| LiH(CsCl) | -     | 66.5            | 12.0            | 32.0            | 30.0  | 30.2  | 0.1265 | 0.9947 | -0.6630           | GGA <sup>26</sup>   |
| KH(NaCl)  | -     | 31.1            | 8.35            | 14.47           | 13.1  | 15.9  | 0.1766 | 0.8247 | -0.3841           | GGA <sup>26</sup>   |
| KH(CsCl)  | -     | 51.0            | 4.5             | 20.0            | 21.2  | 20.0  | 0.1078 | 1.062  | -0.7750           | GGA <sup>26</sup>   |
| CsH(NaCl) | -     | 23.23           | 6.761           | 9.74            | 9.1   | 12.3  | 0.2021 | 0.7434 | -0.2432           | GGA <sup>26</sup>   |
| CsH(CsCl) | -     | 38.0            | 3.2             | 6.5             | 9.8   | 14.8  | 0.2295 | 0.6599 | -0.2230           | GGA <sup>26</sup>   |

TABLE III: The elastic properties (in GPa) of cubic structures, as well as experimental results(continued)

|                 | C <sub>11</sub> | C <sub>12</sub> | C <sub>44</sub> | G     | B     | $\nu$  | G/B    | Cauchy Pressure/B | Note                       |
|-----------------|-----------------|-----------------|-----------------|-------|-------|--------|--------|-------------------|----------------------------|
| Ne              | 1.31            | 0.65            | 0.58            | 0.46  | 0.87  | 0.2742 | 0.5317 | 0.0805            | This work                  |
| Ne              | 1.206           | 0.732           | 0.633           | 0.427 | 0.89  | 0.2932 | 0.4798 | 0.1112            | 0GPa,23.7K <sup>27</sup>   |
| Ne              | 1.175           | 0.74            | 0.595           | 0.398 | 0.885 | 0.3046 | 0.4493 | 0.1638            | 0GPa,24.3K <sup>28</sup>   |
| Ar              | 2.48            | 1.53            | 1.24            | 0.84  | 1.85  | 0.3017 | 0.4571 | 0.1570            | 0GPa,82K <sup>27</sup>     |
| Ar              | 2.38            | 1.56            | 1.12            | 0.75  | 1.83  | 0.3202 | 0.4085 | 0.2400            | 82.3K <sup>29</sup>        |
| Ar              | 16              | 8.4             | 7.5             | 5.7   | 10.9  | 0.2776 | 0.5222 | 0.0823            | 2GPa,RT <sup>30</sup>      |
| Ar              | 32              | 16.3            | 11.6            | 9.9   | 21.5  | 0.3003 | 0.4607 | 0.2183            | 4GPa,RT <sup>30</sup>      |
| Ar              | 48              | 21.9            | 17.6            | 15.6  | 30.6  | 0.2820 | 0.5102 | 0.1405            | 6GPa,RT <sup>30</sup>      |
| Ar              | 74              | 33.3            | 27.1            | 24.2  | 46.9  | 0.2800 | 0.5156 | 0.1323            | 10GPa,RT <sup>30</sup>     |
| Ar              | 109             | 44              | 41              | 37.4  | 65.7  | 0.2609 | 0.5689 | 0.0457            | 15GPa,RT <sup>30</sup>     |
| Ar              | 142             | 54              | 54              | 49.8  | 83.3  | 0.2510 | 0.5970 | 0.0000            | 20GPa,RT <sup>30</sup>     |
| Ar              | 178             | 63              | 68              | 63.6  | 101.3 | 0.2405 | 0.6275 | -0.493            | 25GPa,RT <sup>30</sup>     |
| Ar              | 211             | 71              | 80              | 75.8  | 111.7 | 0.2347 | 0.6445 | -0.0765           | 30GPa,RT <sup>30</sup>     |
| Kr              | 4.99            | 2.86            | 2.69            | 1.85  | 3.57  | 0.2785 | 0.5197 | 0.0476            | This work                  |
| Kr              | 5.14            | 2.84            | 2.68            | 1.9   | 3.61  | 0.2751 | 0.5292 | 0.0444            | 0GPa,10K <sup>31</sup>     |
| Kr              | 2.89            | 1.85            | 1.44            | 0.96  | 2.20  | 0.3097 | 0.4359 | 0.1866            | 0GPa,114K <sup>27</sup>    |
| Kr              | 2.657           | 1.725           | 1.261           | 0.85  | 2.04  | 0.3174 | 0.4157 | 0.2279            | 0GPa,115.6K <sup>32</sup>  |
| Kr              | 14              | 8               | 11              | 7.8   | 10.0  | 0.1905 | 0.7800 | -0.3000           | 2GPa,RT <sup>33</sup>      |
| Kr              | 36              | 17              | 21              | 16.4  | 23.3  | 0.2149 | 0.7039 | -0.1714           | 5GPa,RT <sup>33</sup>      |
| Kr              | 71              | 29              | 34              | 28.0  | 43.0  | 0.2323 | 0.6518 | -0.1163           | 10GPa,RT <sup>33</sup>     |
| Kr              | 101             | 46              | 45              | 36.9  | 64.3  | 0.2591 | 0.5741 | 0.0155            | 15GPa,RT <sup>33</sup>     |
| Kr              | 131             | 62              | 56              | 50    | 83.3  | 0.2510 | 0.5970 | 0.0000            | 20GPa,RT <sup>33</sup>     |
| Kr              | 160             | 79              | 64              | 53.3  | 106.0 | 0.2848 | 0.5026 | 0.1415            | 25GPa,RT <sup>33</sup>     |
| Kr              | 184             | 97              | 70              | 57.8  | 126.0 | 0.3009 | 0.4591 | 0.2143            | 30GPa,RT <sup>33</sup>     |
| Kr              | 205             | 118             | 73              | 59.3  | 147.0 | 0.3222 | 0.4035 | 0.3061            | 35GPa,RT <sup>33</sup>     |
| Xe              | 5.45            | 3.17            | 2.97            | 2.0   | 3.93  | 0.2803 | 0.5148 | 0.0509            | This work                  |
| Xe              | 5.27            | 2.82            | 2.95            | 2.1   | 3.64  | 0.2604 | 0.5702 | -0.0357           | 0GPa,10K <sup>34</sup>     |
| Xe              | 2.98            | 1.9             | 1.48            | 0.99  | 2.26  | 0.3092 | 0.4373 | 0.1858            | 0GPa,156K <sup>35</sup>    |
| Xe              | 7.20            | 5.15            | 2.92            | 1.92  | 5.83  | 0.3517 | 0.3292 | 0.3823            | 0.45GPa,296K <sup>36</sup> |
| Xe              | 19.1            | 13.1            | 8.55            | 5.6   | 15.1  | 0.3344 | 0.3723 | 0.3013            | 2.11GPa,296K <sup>36</sup> |
| Xe              | 24.7            | 17.2            | 10.9            | 7.1   | 19.7  | 0.3389 | 0.3610 | 0.3198            | 2.96GPa,296K <sup>36</sup> |
| Xe              | 28.9            | 19.3            | 12.6            | 8.6   | 22.5  | 0.3312 | 0.3804 | 0.2978            | 3.73GPa,296K <sup>36</sup> |
| Xe              | 36.7            | 24.0            | 14.8            | 10.5  | 28.2  | 0.3340 | 0.3733 | 0.3259            | 4.95GPa,296K <sup>36</sup> |
| Xe              | 43.0            | 28.7            | 18.3            | 12.6  | 33.5  | 0.3333 | 0.3751 | 0.3108            | 6.08GPa,296K <sup>36</sup> |
| Xe              | 55.7            | 37.5            | 22.5            | 15.6  | 43.5  | 0.3396 | 0.3592 | 0.3443            | 8.04GPa,296K <sup>36</sup> |
| Xe              | 63.7            | 42.3            | 26.7            | 18.5  | 49.4  | 0.3336 | 0.3743 | 0.3156            | 10.6GPa,296K <sup>36</sup> |
| Al-Li0.05       | 103.1           | 60.6            | 42.1            | 31.9  | 74.8  | 0.3127 | 0.4280 | 0.2474            | EMT <sup>37</sup>          |
| Al-Li0.10       | 101.1           | 58.2            | 43.3            | 32.6  | 72.5  | 0.3042 | 0.4505 | 0.2055            | EMTO <sup>37</sup>         |
| Al-Li0.15       | 94.7            | 54.9            | 42.5            | 31.3  | 68.2  | 0.3007 | 0.4598 | 0.1819            | EMTO <sup>37</sup>         |
| Al-Li0.20       | 91.0            | 50.1            | 40.9            | 30.9  | 63.7  | 0.2909 | 0.4859 | 0.1444            | EMTO <sup>37</sup>         |
| Fe-Cr0.025      | 284.2           | 131.5           | 108.6           | 94.3  | 182.4 | 0.2795 | 0.5170 | 0.1256            | EMTO <sup>38</sup>         |
| Fe-Cr0.05       | 280.0           | 126.9           | 112.8           | 96.6  | 177.9 | 0.2702 | 0.5427 | 0.0792            | EMTO <sup>38</sup>         |
| Fe-Cr0.075      | 283.5           | 127.2           | 117.5           | 99.8  | 179.3 | 0.2653 | 0.5565 | 0.0541            | EMTO <sup>38</sup>         |
| Fe-Cr0.10       | 287.8           | 127.9           | 120.7           | 102.3 | 181.2 | 0.2624 | 0.5647 | 0.0397            | EMTO <sup>38</sup>         |
| Fe-Cr0.125      | 292.3           | 129.5           | 122.4           | 103.9 | 183.8 | 0.2621 | 0.5656 | 0.0386            | EMTO <sup>38</sup>         |
| Fe-Cr0.15       | 296.8           | 131.7           | 124.1           | 105.4 | 186.7 | 0.2625 | 0.5644 | 0.0407            | EMTO <sup>38</sup>         |
| Fe-Cr0.175      | 305.0           | 137.2           | 125.6           | 106.8 | 193.1 | 0.2665 | 0.5532 | 0.0601            | EMTO <sup>38</sup>         |
| Fe-Cr0.2        | 305.5           | 136.3           | 126.0           | 107.4 | 192.7 | 0.2650 | 0.5574 | 0.0535            | EMTO <sup>38</sup>         |
| Fe-Mg0.025      | 263.7           | 125.3           | 103.6           | 88.1  | 171.4 | 0.2806 | 0.5141 | 0.1266            | EMTO <sup>38</sup>         |
| Fe-Mg0.05       | 235.8           | 112.7           | 101.0           | 82.8  | 153.7 | 0.2717 | 0.5386 | 0.0761            | EMTO <sup>38</sup>         |
| Fe-Mg0.075      | 211.0           | 102.4           | 98.9            | 77.8  | 138.6 | 0.2637 | 0.5610 | 0.0253            | EMTO <sup>38</sup>         |
| Fe-Mg0.1        | 189.7           | 93.4            | 97.9            | 73.6  | 125   | 0.2546 | 0.5867 | -0.0359           | EMTO <sup>38</sup>         |
| NiCoFeCr        | 271             | 175             | 189.3           | 109.9 | 207   | 0.2358 | 0.6414 | -0.0691           | EMTO <sup>39</sup>         |
| NiCoFeCrTi      | 184.5           | 170.9           | 127.0           | 47.3  | 175.4 | 0.3044 | 0.4497 | 0.2502            | EMTO <sup>39</sup>         |
| CuNiCoFeCrTi0.1 | 219.7           | 152.6           | 160.2           | 109.5 | 174.9 | 0.2410 | 0.6261 | -0.0434           | EMTO <sup>39</sup>         |
| CuNiCoFeCrTi0.2 | 213.6           | 152.1           | 155.1           | 105.4 | 172.6 | 0.2464 | 0.6104 | -0.0174           | EMTO <sup>39</sup>         |
| CuNiCoFeCrTi0.3 | 209.6           | 151.9           | 154.6           | 104.3 | 171.1 | 0.2467 | 0.6095 | -0.0158           | EMTO <sup>39</sup>         |
| CuNiCoFeCrTi0.4 | 207.6           | 151.7           | 150.8           | 101.7 | 170.3 | 0.2511 | 0.5968 | 0.0053            | EMTO <sup>39</sup>         |
| CuNiCoFeCrTi0.5 | 198.4           | 151.0           | 142.7           | 95.1  | 166.8 | 0.2605 | 0.5701 | 0.0498            | EMTO <sup>39</sup>         |
| CuNiCoFeCrTi0   | 227.8           | 154.6           | 165.3           | 113.8 | 179.0 | 0.2377 | 0.6359 | -0.0598           | EMTO <sup>39</sup>         |
| CuNiCoFeCrTi1   | 174.3           | 148.6           | 125.0           | 80.1  | 157.2 | 0.2821 | 0.5099 | 0.1502            | EMTO <sup>39</sup>         |

TABLE IV: The elastic properties (in GPa) of cubic structures, as well as experimental results(continued)

|                                                         | C <sub>11</sub> | C <sub>12</sub> | C <sub>44</sub> | G     | B     | $\nu$  | G/B    | Cauchy Pressure/B | Note                 |
|---------------------------------------------------------|-----------------|-----------------|-----------------|-------|-------|--------|--------|-------------------|----------------------|
| ZrO <sub>2</sub> -8mol%Y <sub>2</sub> O <sub>3</sub>    | 401.8           | 95.2            | 55.8            | 94.8  | 197.4 | 0.2930 | 0.4802 | 0.1996            | RT* <sup>40</sup>    |
| ZrO <sub>2</sub> -11.1mol%Y <sub>2</sub> O <sub>3</sub> | 403.5           | 102.4           | 59.9            | 96.2  | 202.8 | 0.2953 | 0.4742 | 0.2096            | RT* <sup>40</sup>    |
| ZrO <sub>2</sub> -12.1mol%Y <sub>2</sub> O <sub>3</sub> | 405.1           | 105.3           | 61.8            | 97.0  | 205.2 | 0.2957 | 0.4729 | 0.2120            | RT* <sup>40</sup>    |
| ZrO <sub>2</sub> -15.5mol%Y <sub>2</sub> O <sub>3</sub> | 397.6           | 108.6           | 65.8            | 97.3  | 204.9 | 0.2950 | 0.4749 | 0.2088            | RT* <sup>40</sup>    |
| ZrO <sub>2</sub> -17.9mol%Y <sub>2</sub> O <sub>3</sub> | 390.4           | 110.8           | 69.1            | 97.4  | 204.0 | 0.2941 | 0.4775 | 0.2044            | RT* <sup>40</sup>    |
| ZrO <sub>2</sub> -11.1mol%Y <sub>2</sub> O <sub>3</sub> | 400.2           | 101.8           | 59.0            | 95.1  | 201.3 | 0.2959 | 0.4724 | 0.2127            | 373K* <sup>40</sup>  |
| ZrO <sub>2</sub> -11.1mol%Y <sub>2</sub> O <sub>3</sub> | 395.6           | 101.0           | 57.7            | 93.5  | 199.2 | 0.2971 | 0.4694 | 0.2174            | 473K* <sup>40</sup>  |
| ZrO <sub>2</sub> -11.1mol%Y <sub>2</sub> O <sub>3</sub> | 389.8           | 99.8            | 56.0            | 91.6  | 196.5 | 0.2983 | 0.4662 | 0.2229            | 573K* <sup>40</sup>  |
| ZrO <sub>2</sub> -11.1mol%Y <sub>2</sub> O <sub>3</sub> | 382.0           | 97.1            | 54.1            | 89.4  | 192.1 | 0.2986 | 0.4654 | 0.2239            | 673K* <sup>40</sup>  |
| ZrO <sub>2</sub> -11.1mol%Y <sub>2</sub> O <sub>3</sub> | 373.1           | 91.2            | 52.2            | 87.7  | 185.2 | 0.2955 | 0.4735 | 0.2106            | 773K* <sup>40</sup>  |
| ZrO <sub>2</sub> -11.1mol%Y <sub>2</sub> O <sub>3</sub> | 364.7           | 88.9            | 50.1            | 85.2  | 180.8 | 0.2964 | 0.4712 | 0.2146            | 873K* <sup>40</sup>  |
| ZrO <sub>2</sub> -11.1mol%Y <sub>2</sub> O <sub>3</sub> | 356.6           | 86.8            | 48.0            | 82.8  | 176.7 | 0.2974 | 0.4686 | 0.2195            | 973K* <sup>40</sup>  |
| ZrO <sub>2</sub> -12.1mol%Y <sub>2</sub> O <sub>3</sub> | 401.6           | 104.8           | 60.9            | 95.9  | 203.7 | 0.2965 | 0.4707 | 0.2155            | 373K* <sup>40</sup>  |
| ZrO <sub>2</sub> -12.1mol%Y <sub>2</sub> O <sub>3</sub> | 396.6           | 104.3           | 59.5            | 94.2  | 201.7 | 0.2979 | 0.4670 | 0.2221            | 473K* <sup>40</sup>  |
| ZrO <sub>2</sub> -12.1mol%Y <sub>2</sub> O <sub>3</sub> | 391.2           | 102.9           | 57.9            | 92.4  | 199.0 | 0.2990 | 0.4643 | 0.2261            | 573K* <sup>40</sup>  |
| ZrO <sub>2</sub> -12.1mol%Y <sub>2</sub> O <sub>3</sub> | 385.1           | 100.4           | 56.4            | 90.8  | 195.3 | 0.2987 | 0.4649 | 0.2253            | 673K* <sup>40</sup>  |
| ZrO <sub>2</sub> -12.1mol%Y <sub>2</sub> O <sub>3</sub> | 378.9           | 93.4            | 54.8            | 90.0  | 188.6 | 0.2941 | 0.4772 | 0.2047            | 773K* <sup>40</sup>  |
| ZrO <sub>2</sub> -12.1mol%Y <sub>2</sub> O <sub>3</sub> | 372.1           | 86.9            | 53.2            | 89.0  | 182.0 | 0.2898 | 0.4890 | 0.1852            | 873K* <sup>40</sup>  |
| ZrO <sub>2</sub> -12.1mol%Y <sub>2</sub> O <sub>3</sub> | 364.8           | 82.6            | 51.5            | 87.3  | 176.7 | 0.2879 | 0.4941 | 0.1760            | 973K* <sup>40</sup>  |
| ZrO <sub>2</sub> -15.5mol%Y <sub>2</sub> O <sub>3</sub> | 394.5           | 108.2           | 64.9            | 96.2  | 203.6 | 0.2959 | 0.4725 | 0.2126            | 373K* <sup>40</sup>  |
| ZrO <sub>2</sub> -15.5mol%Y <sub>2</sub> O <sub>3</sub> | 389.8           | 107.3           | 63.5            | 94.6  | 201.5 | 0.2970 | 0.4695 | 0.2174            | 473K* <sup>40</sup>  |
| ZrO <sub>2</sub> -15.5mol%Y <sub>2</sub> O <sub>3</sub> | 384.7           | 106.4           | 61.9            | 92.8  | 199.2 | 0.2984 | 0.4659 | 0.2234            | 573K* <sup>40</sup>  |
| ZrO <sub>2</sub> -15.5mol%Y <sub>2</sub> O <sub>3</sub> | 379.5           | 105.0           | 59.9            | 90.8  | 196.5 | 0.2998 | 0.4621 | 0.2295            | 673K* <sup>40</sup>  |
| ZrO <sub>2</sub> -15.5mol%Y <sub>2</sub> O <sub>3</sub> | 373.6           | 102.1           | 57.7            | 88.9  | 192.6 | 0.3000 | 0.4616 | 0.2305            | 773K* <sup>40</sup>  |
| ZrO <sub>2</sub> -15.5mol%Y <sub>2</sub> O <sub>3</sub> | 366.8           | 98.2            | 55.3            | 86.9  | 187.7 | 0.2995 | 0.4630 | 0.2285            | 873K* <sup>40</sup>  |
| ZrO <sub>2</sub> -15.5mol%Y <sub>2</sub> O <sub>3</sub> | 360.2           | 96.3            | 52.6            | 84.3  | 184.3 | 0.3016 | 0.4574 | 0.2372            | 973K* <sup>40</sup>  |
| ZrO <sub>2</sub> -17.9mol%Y <sub>2</sub> O <sub>3</sub> | 387.0           | 109.9           | 68.1            | 96.3  | 202.3 | 0.2946 | 0.4760 | 0.2067            | 373K* <sup>40</sup>  |
| ZrO <sub>2</sub> -17.9mol%Y <sub>2</sub> O <sub>3</sub> | 382.8           | 108.9           | 66.7            | 94.8  | 200.2 | 0.2955 | 0.4735 | 0.2108            | 473K* <sup>40</sup>  |
| ZrO <sub>2</sub> -17.9mol%Y <sub>2</sub> O <sub>3</sub> | 378.1           | 107.5           | 65.2            | 93.2  | 197.7 | 0.2963 | 0.4714 | 0.2140            | 573K* <sup>40</sup>  |
| ZrO <sub>2</sub> -17.9mol%Y <sub>2</sub> O <sub>3</sub> | 373.4           | 105.6           | 63.3            | 91.5  | 194.9 | 0.2970 | 0.4695 | 0.2171            | 673K* <sup>40</sup>  |
| ZrO <sub>2</sub> -17.9mol%Y <sub>2</sub> O <sub>3</sub> | 368.2           | 100.5           | 61.2            | 90.3  | 189.7 | 0.2946 | 0.4760 | 0.2071            | 773K* <sup>40</sup>  |
| ZrO <sub>2</sub> -17.9mol%Y <sub>2</sub> O <sub>3</sub> | 361.4           | 98.1            | 58.8            | 87.9  | 185.9 | 0.2958 | 0.4728 | 0.2114            | 873K* <sup>40</sup>  |
| ZrO <sub>2</sub> -17.9mol%Y <sub>2</sub> O <sub>3</sub> | 353.8           | 94.0            | 56.2            | 85.7  | 180.6 | 0.2951 | 0.4745 | 0.2093            | 973K* <sup>40</sup>  |
| Fe-30Al                                                 | 147             | 96.3            | 116.3           | 79.9  | 113.2 | 0.2143 | 0.7058 | -0.1767           | 273K* <sup>41</sup>  |
| Fe-30Al                                                 | 137.2           | 92.4            | 110.4           | 75.2  | 107.3 | 0.2159 | 0.7008 | -0.1677           | 428K* <sup>41</sup>  |
| Fe-30Al                                                 | 134.2           | 91.4            | 108.9           | 73.9  | 105.7 | 0.2165 | 0.6991 | -0.1656           | 473K* <sup>41</sup>  |
| Fe-30Al                                                 | 131.1           | 90.4            | 107.3           | 72.5  | 104.0 | 0.2171 | 0.6973 | -0.1626           | 523K* <sup>41</sup>  |
| Fe-30Al                                                 | 128.3           | 89.6            | 105.3           | 70.9  | 102.5 | 0.2189 | 0.6917 | -0.1532           | 573K* <sup>41</sup>  |
| Fe-30Al                                                 | 123.4           | 87.3            | 100.6           | 67.6  | 99.3  | 0.2226 | 0.6804 | -0.1339           | 673K* <sup>41</sup>  |
| Fe-30Al                                                 | 117.9           | 83.8            | 95.1            | 63.9  | 95.2  | 0.2258 | 0.6710 | -0.1187           | 773K* <sup>41</sup>  |
| Fe-30Al                                                 | 111.3           | 79.7            | 89.1            | 59.8  | 90.2  | 0.2287 | 0.6625 | -0.1042           | 873K* <sup>41</sup>  |
| Fe-30Al                                                 | 103.9           | 75.8            | 86.1            | 57.3  | 85.2  | 0.2253 | 0.6725 | -0.1209           | 973K* <sup>41</sup>  |
| Fe-30Al                                                 | 92.3            | 69.3            | 78.5            | 51.7  | 76.9  | 0.2256 | 0.6717 | -0.1195           | 1173K* <sup>41</sup> |
| MgO                                                     | 298.96          | 96.42           | 157.13          | 131.8 | 163.9 | 0.1831 | 0.8037 | -0.3703           | 300K <sup>42</sup>   |
| MgO                                                     | 292.94          | 97.02           | 155.78          | 129.3 | 162.3 | 0.1852 | 0.7968 | -0.3620           | 400K <sup>42</sup>   |
| MgO                                                     | 296.92          | 97.64           | 154.33          | 126.8 | 160.7 | 0.1876 | 0.7892 | -0.3527           | 500K <sup>42</sup>   |
| MgO                                                     | 280.62          | 98.0            | 152.84          | 124.3 | 158.9 | 0.1897 | 0.7824 | -0.3452           | 600K <sup>42</sup>   |
| MgO                                                     | 274.47          | 98.43           | 151.31          | 121.8 | 157.1 | 0.1921 | 0.7750 | -0.3366           | 700K <sup>42</sup>   |
| MgO                                                     | 268.22          | 98.54           | 149.68          | 119.2 | 155.1 | 0.1941 | 0.7685 | -0.3297           | 800K <sup>42</sup>   |
| MgO                                                     | 261.94          | 98.62           | 148.1           | 116.6 | 153.1 | 0.1962 | 0.7620 | -0.3233           | 900K <sup>42</sup>   |
| MgO                                                     | 255.74          | 98.74           | 146.52          | 114.1 | 151.1 | 0.1984 | 0.7550 | -0.3163           | 1000K <sup>42</sup>  |
| MgO                                                     | 249.52          | 98.6            | 144.77          | 111.5 | 148.9 | 0.2005 | 0.7485 | -0.3101           | 1100K <sup>42</sup>  |
| MgO                                                     | 243.32          | 98.38           | 143.06          | 108.9 | 146.7 | 0.2025 | 0.7423 | -0.3046           | 1200K <sup>42</sup>  |
| MgO                                                     | 237.15          | 98.05           | 141.33          | 106.3 | 144.4 | 0.2044 | 0.7362 | -0.2997           | 1300K <sup>42</sup>  |
| MgO                                                     | 230.96          | 97.56           | 139.54          | 103.8 | 142.0 | 0.2062 | 0.7306 | -0.3233           | 1400K <sup>42</sup>  |
| MgO                                                     | 224.88          | 97.08           | 137.86          | 101.3 | 139.7 | 0.2081 | 0.7249 | -0.2920           | 1500K <sup>42</sup>  |
| MgO                                                     | 219.04          | 96.44           | 136.24          | 98.9  | 137.3 | 0.2096 | 0.7201 | -0.2899           | 1600K <sup>42</sup>  |
| MgO                                                     | 213.43          | 95.69           | 134.65          | 96.6  | 134.9 | 0.2110 | 0.7160 | -0.2887           | 1700K <sup>42</sup>  |
| MgO                                                     | 208.18          | 95.02           | 133.12          | 94.4  | 132.7 | 0.2125 | 0.7115 | -0.2870           | 1800K <sup>42</sup>  |
| CaO                                                     | 220.53          | 57.67           | 80.03           | 80.6  | 111.9 | 0.2097 | 0.7198 | -0.1997           | 300K <sup>43</sup>   |
| CaO                                                     | 215.66          | 57.96           | 79.34           | 79.14 | 110.5 | 0.2110 | 0.7161 | -0.1934           | 400K <sup>43</sup>   |
| CaO                                                     | 210.73          | 58.23           | 78.70           | 77.7  | 109.1 | 0.2121 | 0.7125 | -0.1877           | 500K <sup>43</sup>   |
| CaO                                                     | 205.88          | 58.44           | 77.94           | 76.22 | 107.6 | 0.2134 | 0.7085 | -0.1812           | 600K <sup>43</sup>   |
| CaO                                                     | 201.22          | 58.66           | 77.18           | 74.76 | 106.2 | 0.2149 | 0.7041 | -0.1744           | 700K <sup>43</sup>   |
| CaO                                                     | 196.58          | 58.81           | 76.46           | 73.3  | 104.7 | 0.2162 | 0.7002 | -0.1685           | 800K <sup>43</sup>   |
| CaO                                                     | 192.03          | 58.98           | 75.72           | 71.9  | 103.3 | 0.2176 | 0.6958 | -0.1620           | 900K <sup>43</sup>   |
| CaO                                                     | 187.24          | 58.98           | 74.92           | 70.4  | 101.7 | 0.2189 | 0.6920 | -0.1567           | 1000K <sup>43</sup>  |
| CaO                                                     | 182.74          | 58.96           | 74.17           | 68.9  | 100.2 | 0.2200 | 0.6884 | -0.1518           | 1100K <sup>43</sup>  |
| CaO                                                     | 178.11          | 58.99           | 73.48           | 67.6  | 98.7  | 0.2213 | 0.6845 | -0.1468           | 1200K <sup>43</sup>  |

TABLE V: The calculated lattice parameters (in Å) and elastic properties (in GPa) of hexagonal and tetragonal structure, as well as experimental results

|                                  | a     | c      | C <sub>11</sub> | C <sub>12</sub> | C <sub>13</sub> | C <sub>33</sub> | C <sub>44</sub> | C <sub>66</sub> | G     | B     | $\nu$  | G/B    | Cauchy Pressure/B | Note                |
|----------------------------------|-------|--------|-----------------|-----------------|-----------------|-----------------|-----------------|-----------------|-------|-------|--------|--------|-------------------|---------------------|
| Ti                               | -     | -      | 160             | 90              | 66              | 181             | 46.5            | 35              | 43    | 105   | 0.3184 | 0.4133 | 0.3548            | Expt <sup>44</sup>  |
| Zr                               | -     | -      | 145.3           | 63.9            | 66.5            | 165.4           | 27.5            | 40.7            | 36    | 94    | 0.3322 | 0.3779 | 0.3297            | Expt <sup>44</sup>  |
| Sc                               | -     | -      | 92.9            | 31.7            | 30.1            | 90.6            | 31.4            | 30.6            | 31    | 51    | 0.2479 | 0.6061 | -0.0019           | Calc <sup>44</sup>  |
| Sc                               | -     | -      | 99.3            | 39.7            | 29.4            | 107             | 27.7            | 29.8            | 31    | 56    | 0.2684 | 0.5478 | 0.1039            | Expt <sup>44</sup>  |
| Y                                | -     | -      | 77.4            | 23.9            | 21.3            | 80.9            | 22.4            | 26.8            | 25    | 41    | 0.2427 | 0.6213 | -0.049            | Calc <sup>44</sup>  |
| Y                                | -     | -      | 77.9            | 29.2            | 21.0            | 76.9            | 24.7            | 24.4            | 26    | 43    | 0.2525 | 0.5928 | 0.0134            | Expt <sup>44</sup>  |
| Re                               | -     | -      | 649             | 269.4           | 187.6           | 678.1           | 185             | 189.8           | 199   | 363   | 0.2678 | 0.5493 | 0.1134            | Calc <sup>44</sup>  |
| Re                               | -     | -      | 634.4           | 266             | 202             | 701.1           | 169.1           | 184.2           | 189   | 368   | 0.2804 | 0.5145 | 0.1559            | Expt <sup>44</sup>  |
| Tb                               | -     | -      | 73.8            | 20.3            | 18.1            | 75.2            | 24.1            | 26.8            | 26    | 37    | 0.2169 | 0.6978 | -0.1677           | Calc <sup>44</sup>  |
| Tb                               | -     | -      | 68.6            | 24.7            | 22.4            | 73.3            | 21.6            | 22.0            | 22    | 39    | 0.2580 | 0.5770 | 0.0451            | Expt <sup>44</sup>  |
| Tc                               | -     | -      | 525.4           | 229.7           | 184.7           | 596.3           | 160             | 147.8           | 162   | 316   | 0.2807 | 0.5137 | 0.1686            | Calc <sup>44</sup>  |
| Ru                               | -     | -      | 622.5           | 203             | 179.8           | 724.6           | 212.4           | 210             | 220   | 343   | 0.2361 | 0.6404 | -0.0573           | Calc <sup>44</sup>  |
| Ru                               | -     | -      | 563             | 188             | 168             | 624             | 181             | 187.5           | 191   | 311   | 0.2448 | 0.6149 | -0.0201           | Expt <sup>44</sup>  |
| Gd                               | -     | -      | 70.0            | 23.1            | 18.2            | 72.1            | 21.6            | 23.4            | 23    | 37    | 0.2378 | 0.6353 | -0.0493           | Calc <sup>44</sup>  |
| Gd                               | -     | -      | 67.8            | 25.6            | 20.7            | 71.2            | 20.8            | 21.1            | 22    | 38    | 0.2587 | 0.5751 | 0.0585            | Expt <sup>44</sup>  |
| Os                               | -     | -      | 816.3           | 225.2           | 256.1           | 915             | 312.7           | 295.5           | 305   | 446   | 0.2218 | 0.6831 | -0.1422           | Calc <sup>44</sup>  |
| Na <sub>3</sub> Bi               | 5.469 | 9.735  | 35.9            | 13.5            | 4.0             | 40.9            | 7.0             | 11.2            | 10    | 17    | 0.2490 | 0.6029 | -0.0202           | This work           |
| Na <sub>3</sub> Bi               | 5.448 | 9.655  | -               | -               | -               | -               | -               | -               | -     | -     | -      | -      | -                 | Expt <sup>45</sup>  |
| K <sub>3</sub> Bi                | 6.217 | 11.044 | 20.0            | 9.4             | 3.0             | 24.7            | 4.2             | 5.3             | 6     | 11    | 0.2735 | 0.5336 | 0.1372            | This work           |
| Graphene                         | 2.469 | 8.346  | 896.6           | 176.0           | 23.0            | 104.3           | 40.7            | 360.3           | 136   | 177   | 0.1931 | 0.7715 | -0.5713           | This work*          |
| Graphene                         | 2.46  | -      | -               | -               | -               | -               | -               | 360.3           | -     | -     | -      | -      | -                 | Expt                |
| NaBi                             | 3.443 | 4.886  | 64.6            | 19.7            | 13.6            | 46.7            | 11.5            | 9.1             | 14    | 29    | 0.2933 | 0.4796 | 0.2153            | This work           |
| AlN                              | -     | -      | 345             | 125             | 120             | 395             | 118             | 110             | 117   | 201   | 0.2567 | 0.5807 | 0.0422            | Expt <sup>46</sup>  |
| GaN                              | -     | -      | 367             | 135             | 103             | 405             | 95              | 116             | 113   | 202   | 0.2649 | 0.5575 | 0.0667            | Calc <sup>46</sup>  |
| GaN                              | -     | -      | 390             | 145             | 106             | 398             | 105             | 122.5           | 120   | 210   | 0.2599 | 0.5718 | 0.0559            | Expt <sup>46</sup>  |
| InN                              | -     | -      | 190             | 104             | 121             | 182             | 10              | 43              | 22    | 139   | 0.4237 | 0.1608 | 0.6175            | Calc <sup>16</sup>  |
| ReN                              | -     | -      | 570             | 252             | 202             | 794             | 110             | 159             | 153   | 359   | 0.3133 | 0.4263 | 0.2580            | Calc <sup>47</sup>  |
| Re <sub>2</sub> N                | -     | -      | 662             | 237             | 258             | 870             | 192             | 212.5           | 213   | 407   | 0.2770 | 0.5239 | 0.1111            | Calc <sup>47</sup>  |
| Re <sub>3</sub> N                | -     | -      | 657             | 248             | 244             | 794             | 198             | 204.5           | 213   | 401   | 0.2742 | 0.5317 | 0.1116            | Calc <sup>47</sup>  |
| ZnO                              | -     | -      | 210             | 121             | 105             | 211             | 43              | 44.5            | 46    | 144   | 0.3556 | 0.3195 | 0.4823            | Calc <sup>48</sup>  |
| ZnO                              | -     | -      | 191.9           | 107.3           | 88.6            | 217             | 38.3            | 42.3            | -     | -     | -      | -      | -                 | Calc <sup>48</sup>  |
| Zr <sub>2</sub> Al               | -     | -      | 178.08          | 85.16           | 53.25           | 186.68          | 57.19           | 46.4            | 55    | 103   | 0.2733 | 0.5341 | 0.1694            | Calc <sup>20</sup>  |
| Zr <sub>4</sub> Al <sub>3</sub>  | -     | -      | 218.20          | 40.11           | 57.23           | 213.16          | 74.6            | 89              | 80    | 106   | 0.1985 | 0.7546 | -0.3112           | Calc <sup>20</sup>  |
| Zr <sub>5</sub> Al <sub>4</sub>  | -     | -      | 184.73          | 76.54           | 48.72           | 192.69          | 30.36           | 54              | 46    | 101   | 0.3026 | 0.4546 | 0.2024            | Calc <sup>20</sup>  |
| ZrAl <sub>2</sub>                | -     | -      | 236.81          | 46.65           | 57.05           | 217.22          | 90.01           | 95.0            | 90    | 112   | 0.1836 | 0.8020 | -0.3615           | Calc <sup>20</sup>  |
| Pd <sub>3</sub> Zr               | -     | -      | 268             | 90              | 99              | 305             | 70              | 89              | 82    | 157   | 0.2778 | 0.5217 | 0.0955            | Calc <sup>53</sup>  |
| parahydrogen                     | -     | -      | 0.334           | 0.13            | 0.056           | 0.408           | 0.104           | 0.102           | 82    | 157   | 0.2778 | 0.5217 | 0.0955            | 13.2K <sup>49</sup> |
| SnO <sub>2</sub>                 | -     | -      | 260             | 197             | 117             | 429             | 131             | 225             | 109   | 200   | 0.2703 | 0.5426 | -0.1049           | Calc <sup>50</sup>  |
| SnO <sub>2</sub>                 | -     | -      | 262             | 177             | 156             | 449             | 103             | 207             | 102   | 212   | 0.2937 | 0.4784 | 0.054             | Expt <sup>50</sup>  |
| IrN <sub>2</sub>                 | -     | -      | 322             | 301             | 217             | 553             | 103             | 273             | 83    | 294   | 0.3705 | 0.2835 | 0.2419            | Calc                |
| V <sub>2</sub> B                 | -     | -      | 496             | 94              | 122             | 442             | 223             | 197             | 200   | 234   | 0.1673 | 0.8550 | -0.4352           | Calc <sup>51</sup>  |
| Nb <sub>2</sub> B                | -     | -      | 439             | 89              | 143             | 361             | 164             | 145             | 150   | 221   | 0.2226 | 0.6807 | -0.1743           | Calc <sup>51</sup>  |
| Ta <sub>2</sub> B                | -     | -      | 475             | 101             | 154             | 393             | 173             | 175             | 165   | 240   | 0.2207 | 0.6864 | -0.1938           | Calc <sup>51</sup>  |
| V <sub>3</sub> B <sub>2</sub>    | -     | -      | 551             | 89              | 132             | 459             | 215             | 183             | 202   | 252   | 0.1836 | 0.8021 | -0.3517           | Calc <sup>51</sup>  |
| Nb <sub>3</sub> B <sub>2</sub>   | -     | -      | 474             | 92              | 121             | 449             | 169             | 135             | 164   | 229   | 0.2108 | 0.7167 | -0.1983           | Calc <sup>51</sup>  |
| Ta <sub>3</sub> B <sub>2</sub>   | -     | -      | 506             | 126             | 141             | 470             | 204             | 150             | 182   | 255   | 0.2121 | 0.7125 | -0.1704           | Calc <sup>51</sup>  |
| VB <sub>2</sub>                  | -     | -      | 672             | 120             | 130             | 470             | 223             | 276             | 237   | 283   | 0.1718 | 0.8402 | -0.4405           | Calc <sup>51</sup>  |
| NbB <sub>2</sub>                 | -     | -      | 602             | 106             | 186             | 429             | 218             | 248             | 209   | 286   | 0.2071 | 0.7279 | -0.3037           | Calc <sup>51</sup>  |
| TaB <sub>2</sub>                 | -     | -      | 596             | 142             | 196             | 427             | 190             | 227             | 190   | 297   | 0.2362 | 0.6402 | -0.1331           | Calc <sup>51</sup>  |
| C <sub>4</sub>                   | -     | -      | 932.6           | 172.1           | 58.5            | 1189.6          | 446.7           | 324.5           | 422   | 403   | 0.1121 | 1.046  | -0.6708           | Calc <sup>52</sup>  |
| Sn                               | -     | -      | 74.2            | 58              | 22.2            | 81.2            | 23.4            | 9.9             | 17    | 48    | 0.3388 | 0.3612 | 0.4904            | Calc <sup>18</sup>  |
| ZrAl <sub>3</sub>                | -     | -      | 203.98          | 65.35           | 44.7            | 202.2           | 81.06           | 100.21          | 82    | 102   | 0.1824 | 0.8057 | -0.3489           | Calc <sup>20</sup>  |
| Zr <sub>5</sub> Al <sub>3</sub>  | -     | -      | 183.2           | 67.59           | 61.27           | 167.57          | 32.65           | 64.61           | 47    | 101   | 0.2999 | 0.4618 | 0.1979            | Calc <sup>20</sup>  |
| Pd <sub>11</sub> Zr <sub>9</sub> | -     | -      | 171             | 127             | 116             | 187             | 36              | 23              | 30    | 139   | 0.4003 | 0.2136 | 0.6641            | Calc <sup>53</sup>  |
| PdZr <sub>2</sub>                | -     | -      | 197             | 86              | 106             | 149             | 64              | 47              | 49    | 126   | 0.3292 | 0.3856 | 0.3214            | Calc <sup>53</sup>  |
| MoSi <sub>2</sub>                | -     | -      | 410             | 114.9           | 87.5            | 514             | 207             | 200             | 190.7 | 212.1 | 0.1541 | 0.8991 | -0.4823           | Calc <sup>54</sup>  |
| WSi <sub>2</sub>                 | -     | -      | 442.8           | 121.7           | 81.0            | 552.3           | 211.6           | 217.5           | 203.5 | 222.4 | 0.1494 | 0.9151 | -0.5089           | Expt <sup>54</sup>  |
| WSi <sub>2</sub>                 | -     | -      | 372             | 116             | 81.6            | 596             | 211             | 236             | 197   | 208   | 0.1401 | 0.9471 | -0.5996           | Calc <sup>54</sup>  |
| MoSi <sub>2</sub>                | -     | -      | 403.7           | 114.5           | 88.0            | 505.3           | 202.7           | 194.8           | 186.5 | 209.9 | 0.1572 | 0.8888 | -0.4646           | Expt <sup>54</sup>  |
| MoSi <sub>2</sub>                | -     | -      | 345             | 109             | 87.7            | 547             | 190             | 220             | 178.8 | 197.7 | 0.1525 | 0.9046 | -0.5393           | Calc <sup>54</sup>  |
| CrSi <sub>2</sub>                | -     | -      | 372.2           | 45.3            | 82.6            | 385.2           | 149.1           | 163.5           | 153   | 171.9 | 0.1563 | 0.8916 | -0.5370           | Expt <sup>54</sup>  |
| CrSi <sub>2</sub>                | -     | -      | 372             | 45.3            | 68.3            | 441             | 146             | 163             | 157.4 | 171.1 | 0.1481 | 0.9195 | -0.5708           | Calc <sup>54</sup>  |
| VSi <sub>2</sub>                 | -     | -      | 357.8           | 50.6            | 68.1            | 422.3           | 146             | 153.6           | 152.3 | 167.2 | 0.1507 | 0.9108 | -0.5410           | Expt <sup>54</sup>  |
| VSi <sub>2</sub>                 | -     | -      | 356             | 50.6            | 67.0            | 430             | 135.7           | 154             | 148.3 | 167.0 | 0.1574 | 0.8800 | -0.5153           | Calc <sup>54</sup>  |
| NbSi <sub>2</sub>                | -     | -      | 380.2           | 75.9            | 88.3            | 468             | 145.3           | 152.2           | 153.2 | 191.5 | 0.1843 | 0.7996 | -0.3480           | Expt <sup>54</sup>  |
| NbSi <sub>2</sub>                | -     | -      | 380             | 75.9            | 80.4            | 508             | 144             | 152             | 155.8 | 191.8 | 0.1803 | 0.8124 | -0.3652           | Calc <sup>54</sup>  |
| TaSi <sub>2</sub>                | -     | -      | 375             | 78.4            | 90.1            | 476.7           | 143.7           | 148.5           | 151.1 | 192.4 | 0.1887 | 0.7855 | -0.3215           | Expt <sup>54</sup>  |
| TaSi <sub>2</sub>                | -     | -      | 375             | 78.4            | 82.1            | 517             | 142             | 148             | 153.4 | 192.7 | 0.1854 | 0.7962 | -0.3361           | Calc <sup>54</sup>  |

TABLE VI: The elastic properties (in GPa) of cubic, tetragonal and orthorhombic structure,as well as experimental results.

|                                 | C <sub>11</sub> | C <sub>12</sub> | C <sub>13</sub> | C <sub>23</sub> | C <sub>22</sub> | C <sub>33</sub> | C <sub>44</sub> | C <sub>55</sub> | C <sub>66</sub> | G     | B     | $\nu$  | G/B    | Cauchy Pressure/B | Note                |
|---------------------------------|-----------------|-----------------|-----------------|-----------------|-----------------|-----------------|-----------------|-----------------|-----------------|-------|-------|--------|--------|-------------------|---------------------|
| TiSi <sub>2</sub>               | 317.5           | 29.35           | 38.45           | 86.0            | 320.4           | 413.2           | 112.5           | 75.8            | 117.5           | 117.0 | 148.9 | 0.1887 | 0.7856 | -0.3403           | Calc <sup>54</sup>  |
| TiSi <sub>2</sub>               | 276             | 29.9            | 33.4            | 93.5            | 302             | 394             | 119             | 755             | 134             | 116.2 | 140.9 | 0.1765 | 0.8249 | -0.3944           | Calc <sup>54</sup>  |
| Mo(Si,Al) <sub>2</sub>          | 402.8           | 74.2            | 107.1           | -               | -               | 434.4           | 148.2           | -               | 164.3           | 155.3 | 201.4 | 0.1932 | 0.7714 | -0.3258           | RT <sup>55</sup>    |
| Mo(Si,Al) <sub>2</sub>          | 398.0           | 75.2            | 107.8           | -               | -               | 430.6           | 146.4           | -               | 161.7           | 153.1 | 200.4 | 0.1956 | 0.7638 | -0.3121           | 400K <sup>55</sup>  |
| Mo(Si,Al) <sub>2</sub>          | 392.1           | 73.8            | 105.3           | -               | -               | 420.7           | 144.3           | -               | 159.5           | 150.8 | 196.6 | 0.1947 | 0.7667 | -0.3171           | 500K <sup>55</sup>  |
| Mo(Si,Al) <sub>2</sub>          | 388.4           | 73.7            | 105.3           | -               | -               | 416.3           | 142.1           | -               | 157.6           | 148.7 | 195.3 | 0.1963 | 0.7615 | -0.3090           | 600K <sup>55</sup>  |
| Mo(Si,Al) <sub>2</sub>          | 384.1           | 73.2            | 105.1           | -               | -               | 410.3           | 140.5           | -               | 155.6           | 146.8 | 193.5 | 0.1973 | 0.7585 | -0.3044           | 700K <sup>55</sup>  |
| Mo(Si,Al) <sub>2</sub>          | 379.8           | 73.4            | 104.3           | -               | -               | 405.9           | 138.6           | -               | 153.1           | 144.7 | 191.7 | 0.1984 | 0.7549 | -0.2973           | 800K <sup>55</sup>  |
| Mo(Si,Al) <sub>2</sub>          | 375.5           | 73.6            | 106.5           | -               | -               | 403.2           | 136.7           | -               | 151.2           | 142.5 | 191.4 | 0.2018 | 0.7445 | -0.2815           | 900K <sup>55</sup>  |
| Mo(Si,Al) <sub>2</sub>          | 371.3           | 73.5            | 106.5           | -               | -               | 398.8           | 135.0           | -               | 149.3           | 140.6 | 189.9 | 0.2032 | 0.7401 | -0.2745           | 1000K <sup>55</sup> |
| Mo(Si,Al) <sub>2</sub>          | 366.4           | 73.0            | 106.3           | -               | -               | 393.9           | 132.9           | -               | 146.7           | 138.3 | 188.1 | 0.2047 | 0.7353 | -0.2666           | 1100K <sup>55</sup> |
| Mo(Si,Al) <sub>2</sub>          | 361.1           | 71.9            | 105.1           | -               | -               | 385.6           | 130.7           | -               | 144.8           | 136.0 | 185.3 | 0.2051 | 0.7342 | -0.2658           | 1200K <sup>55</sup> |
| TiO <sub>2</sub>                | 646             | 250             | 229             | 283             | 475             | 635             | 148             | 203             | 246             | 180   | 362   | 0.2869 | 0.4968 | 0.1520            | Calc <sup>56</sup>  |
| ZrO <sub>2</sub>                | 619             | 176             | 210             | 224             | 450             | 632             | 107             | 178             | 174             | 160   | 320   | 0.2858 | 0.4998 | 0.1573            | Calc <sup>56</sup>  |
| HfO <sub>2</sub>                | 664             | 193             | 236             | 235             | 575             | 640             | 137             | 185             | 165             | 176   | 355   | 0.2873 | 0.4958 | 0.1660            | Calc <sup>56</sup>  |
| FeB <sub>2</sub>                | 592             | 185             | 160             | 136             | 723             | 574             | 271             | 198             | 221             | 230   | 315   | 0.2066 | 0.7296 | -0.2211           | Calc <sup>57</sup>  |
| FeB <sub>4</sub>                | 409             | 161             | 161             | 152             | 768             | 451             | 216             | 154             | 222             | 189   | 278   | 0.2226 | 0.6807 | -0.1416           | Calc <sup>57</sup>  |
| VB                              | 560             | 126             | 130             | 130             | 559             | 572             | 248             | 248             | 188             | 223   | 274   | 0.1800 | 0.8135 | -0.3630           | Calc <sup>51</sup>  |
| NbB                             | 513             | 119             | 148             | 148             | 513             | 505             | 219             | 219             | 158             | 192   | 262   | 0.2058 | 0.7321 | -0.2300           | Calc <sup>51</sup>  |
| TaB                             | 545             | 117             | 169             | 169             | 545             | 518             | 222             | 222             | 163             | 196   | 280   | 0.2155 | 0.7023 | -0.1811           | Calc <sup>51</sup>  |
| V <sub>5</sub> B <sub>6</sub>   | 616             | 83              | 134             | 140             | 634             | 477             | 224             | 265             | 234             | 234   | 270   | 0.1646 | 0.8641 | -0.4513           | Calc <sup>51</sup>  |
| Nb <sub>5</sub> B <sub>6</sub>  | 535             | 117             | 168             | 157             | 537             | 452             | 227             | 245             | 194             | 202   | 267   | 0.1977 | 0.7574 | -0.2793           | Calc <sup>51</sup>  |
| Ta <sub>5</sub> B <sub>6</sub>  | 552             | 139             | 167             | 164             | 563             | 484             | 227             | 233             | 194             | 205   | 282   | 0.2078 | 0.7157 | -0.2176           | Calc <sup>51</sup>  |
| V <sub>3</sub> B <sub>4</sub>   | 475             | 135             | 135             | 90              | 636             | 626             | 235             | 263             | 229             | 235   | 272   | 0.1644 | 0.8647 | -0.4501           | Calc <sup>51</sup>  |
| Nb <sub>3</sub> B <sub>4</sub>  | 521             | 123             | 155             | 133             | 549             | 553             | 222             | 220             | 217             | 212   | 272   | 0.1899 | 0.7817 | -0.3045           | Calc <sup>51</sup>  |
| Ta <sub>3</sub> B <sub>4</sub>  | 531             | 135             | 167             | 156             | 559             | 557             | 209             | 211             | 214             | 206   | 285   | 0.2086 | 0.7232 | -0.2061           | Calc <sup>51</sup>  |
| V <sub>2</sub> B <sub>3</sub>   | 484             | 128             | 129             | 98              | 642             | 639             | 254             | 248             | 229             | 239   | 274   | 0.1621 | 0.8721 | -0.4582           | Calc <sup>51</sup>  |
| Nb <sub>2</sub> B <sub>3</sub>  | 499             | 148             | 162             | 106             | 574             | 591             | 218             | 240             | 238             | 221   | 277   | 0.1851 | 0.7971 | -0.3368           | Calc <sup>51</sup>  |
| Ta <sub>2</sub> B <sub>3</sub>  | 517             | 162             | 161             | 137             | 582             | 603             | 211             | 229             | 233             | 217   | 291   | 0.2019 | 0.7442 | -0.2439           | Calc <sup>51</sup>  |
| TiB                             | 411             | 91              | 107             | 61              | 524             | 410             | 189             | 186             | 193             | 185   | 206   | 0.1552 | 0.8953 | -0.4992           | Calc <sup>58</sup>  |
| Nb <sub>6</sub> Sn <sub>5</sub> | 266.5           | 83              | 90.4            | 110.6           | 228.2           | 410             | 210.4           | 65.5            | 62.9            | 54    | 141   | 0.3304 | 0.3824 | 0.3081            | Calc <sup>18</sup>  |
| NbSn <sub>2</sub>               | 180.8           | 77.3            | 68.9            | 60.1            | 178.5           | 188.3           | 52.5            | 37.3            | 57.4            | 51    | 107   | 0.2924 | 0.4818 | 0.1847            | Calc <sup>18</sup>  |
| ZrAl                            | 142.87          | 64.66           | 92.6            | 49.26           | 217.32          | 193.33          | 70.28           | 116.67          | 62.22           | 68    | 107   | 0.2388 | 0.6325 | -0.1331           | Calc <sup>20</sup>  |
| Zr <sub>2</sub> Al <sub>3</sub> | 226.06          | 46.84           | 48.31           | 67.91           | 203.50          | 203.01          | 74.73           | 76.07           | 56.91           | 72    | 107   | 0.2240 | 0.6766 | -0.1397           | Calc <sup>20</sup>  |
| PdZr                            | 169.6           | 108.1           | 134.7           | 126.7           | 230.4           | 229.5           | 70.6            | 67.5            | 16.6            | 42    | 149   | 0.3714 | 0.2813 | 0.4797            | Calc <sup>21</sup>  |
| Ti0.25Mo0.75                    | 363.6           | 151.5           | -               | -               | -               | -               | 62              | -               | -               | 76.9  | 222.2 | 0.3447 | 0.3465 | 0.4028(207)       | Calc <sup>59</sup>  |
| Ti0.5Mo0.5                      | 224.0           | 146.6           | -               | -               | -               | -               | 10.4            | -               | -               | 18.2  | 172.4 | 0.4490 | 0.1056 | 0.7900(52.8)      | Calc <sup>59</sup>  |
| Ti0.75Mo0.25                    | 160.5           | 125.6           | -               | -               | -               | -               | 34.1            | -               | -               | 26.0  | 137.2 | 0.4107 | 0.1899 | 0.6667(73.5)      | Calc <sup>59</sup>  |
| Ti0.25Nb0.75                    | 203.5           | 126.8           | -               | -               | -               | -               | 21.3            | -               | -               | 27.0  | 152.4 | 0.4163 | 0.1773 | 0.6924(76.5)      | Calc <sup>59</sup>  |
| Ti0.5Nb0.5                      | 155.4           | 124.7           | -               | -               | -               | -               | 12.8            | -               | -               | 13.8  | 134.9 | 0.4507 | 0.1020 | 0.8293(39.9)      | Calc <sup>59</sup>  |
| Ti0.75Nb0.25                    | 128.5           | 115.5           | -               | -               | -               | -               | 14.9            | -               | -               | 10.7  | 119.8 | 0.4567 | 0.0891 | 0.8395(31.1)      | Calc <sup>59</sup>  |
| Ti0.25Ta0.75                    | 207.0           | 145.3           | -               | -               | -               | -               | 55.6            | -               | -               | 43.9  | 165.9 | 0.3784 | 0.2646 | 0.5408(121.0)     | Calc <sup>59</sup>  |
| Ti0.5Ta0.5                      | 163.4           | 132.8           | -               | -               | -               | -               | 39.0            | -               | -               | 26.8  | 143.0 | 0.4118 | 0.1874 | 0.6559(75.7)      | Calc <sup>59</sup>  |
| Ti0.75Ta0.25                    | 129.9           | 121.6           | -               | -               | -               | -               | 38.6            | -               | -               | 16.9  | 124.4 | 0.4351 | 0.1357 | 0.6674(48.4)      | Calc <sup>59</sup>  |
| Ti0.25V0.75                     | 213.0           | 132.2           | -               | -               | -               | -               | 29.6            | -               | -               | 33.5  | 159.1 | 0.4016 | 0.2107 | 0.6447(93.9)      | Calc <sup>59</sup>  |
| Ti0.5V0.5                       | 169.6           | 122.3           | -               | -               | -               | -               | 33.6            | -               | -               | 29.2  | 138.1 | 0.4012 | 0.2114 | 0.6424(81.8)      | Calc <sup>59</sup>  |
| Ti0.75V0.25                     | 123.9           | 116.9           | -               | -               | -               | -               | 36.3            | -               | -               | 15.4  | 119.2 | 0.4380 | 0.1293 | 0.6760(44.3)      | Calc <sup>59</sup>  |
| Ti0.25W0.75                     | 374.8           | 184.2           | -               | -               | -               | -               | 81.7            | -               | -               | 86.9  | 247.7 | 0.3430 | 0.3508 | 0.4138(233.4)     | Calc <sup>59</sup>  |
| Ti0.5W0.5                       | 239.9           | 165.9           | -               | -               | -               | -               | 50.9            | -               | -               | 44.8  | 190.6 | 0.3910 | 0.2351 | 0.6035(124.6)     | Calc <sup>59</sup>  |
| Ti0.75W0.25                     | 169.2           | 134.2           | -               | -               | -               | -               | 32.4            | -               | -               | 25.3  | 145.9 | 0.4180 | 0.1735 | 0.6979(71.8)      | Calc <sup>59</sup>  |
| Zr0.25Mo0.75                    | 342.4           | 134.5           | -               | -               | -               | -               | 49.7            | -               | -               | 67.1  | 203.8 | 0.3516 | 0.3293 | 0.4161(181.4)     | Calc <sup>59</sup>  |
| Zr0.5Mo0.5                      | 208.5           | 124.3           | -               | -               | -               | -               | 29.2            | -               | -               | 33.8  | 152.4 | 0.3967 | 0.2220 | 0.6242(94.5)      | Calc <sup>59</sup>  |
| Zr0.75Mo0.25                    | 138.4           | 104.2           | -               | -               | -               | -               | 16.6            | -               | -               | 16.8  | 137.2 | 0.4307 | 0.1453 | 0.7578(48.1)      | Calc <sup>59</sup>  |
| Zr0.25Nb0.75                    | 196.2           | 118.5           | -               | -               | -               | -               | 17.9            | -               | -               | 24.6  | 144.4 | 0.4195 | 0.1700 | 0.6967(69.7)      | Calc <sup>59</sup>  |
| Zr0.5Nb0.5                      | 144.4           | 108.3           | -               | -               | -               | -               | 18.3            | -               | -               | 18.2  | 120.3 | 0.4280 | 0.1512 | 0.7479(52.0)      | Calc <sup>59</sup>  |
| Zr0.75Nb0.25                    | 112.8           | 98.3            | -               | -               | -               | -               | 19.8            | -               | -               | 13.2  | 103.1 | 0.4384 | 0.1284 | 0.7612(38.1)      | Calc <sup>59</sup>  |
| Ag                              | 120.5           | 92.0            | -               | -               | -               | -               | 44.6            | -               | -               | 28    | 101.5 | 0.3726 | 0.2785 | 0.4670            | 400K <sup>60</sup>  |
| Ag                              | 117.0           | 90.0            | -               | -               | -               | -               | 42.6            | -               | -               | 26    | 99    | 0.3753 | 0.2719 | 0.4788            | 500K <sup>60</sup>  |
| Ag                              | 113.5           | 88.0            | -               | -               | -               | -               | 40.7            | -               | -               | 25.6  | 96.5  | 0.3781 | 0.2653 | 0.4902            | 600K <sup>60</sup>  |
| Ag                              | 110.0           | 86.0            | -               | -               | -               | -               | 38.8            | -               | -               | 24    | 94    | 0.3811 | 0.2584 | 0.5021            | 700K <sup>60</sup>  |
| Ag                              | 106.5           | 84.5            | -               | -               | -               | -               | 36.9            | -               | -               | 22.7  | 91.8  | 0.3855 | 0.2480 | 0.5183            | 800K <sup>60</sup>  |
| Au                              | 189             | 160.5           | -               | -               | -               | -               | 41.0            | -               | -               | 26.8  | 199.9 | 0.4250 | 0.1580 | 0.7029            | 400K <sup>60</sup>  |
| Au                              | 185             | 158             | -               | -               | -               | -               | 39.7            | -               | -               | 25.8  | 167   | 0.4266 | 0.1544 | 0.7084            | 500K <sup>60</sup>  |
| Au                              | 182             | 155.5           | -               | -               | -               | -               | 38.3            | -               | -               | 25.0  | 164.3 | 0.4275 | 0.1524 | 0.7132            | 600K <sup>60</sup>  |
| Au                              | 178.5           | 153             | -               | -               | -               | -               | 36.9            | -               | -               | 24.1  | 161.5 | 0.4289 | 0.1493 | 0.7189            | 700K <sup>60</sup>  |
| Au                              | 175.5           | 150.5           | -               | -               | -               | -               | 35.5            | -               | -               | 23.4  | 158.8 | 0.4299 | 0.1472 | 0.7240            | 800K <sup>60</sup>  |

TABLE VII: The elastic properties (in GPa) of actinide and lanthanide intermetallic compounds,as well as experimental results.

|                                    | C <sub>11</sub> | C <sub>12</sub> | C <sub>13</sub> | C <sub>23</sub> | C <sub>22</sub> | C <sub>33</sub> | C <sub>44</sub> | C <sub>55</sub> | C <sub>66</sub> | G    | B     | $\nu$  | G/B    | Cauchy Pressure/B | Note                  |
|------------------------------------|-----------------|-----------------|-----------------|-----------------|-----------------|-----------------|-----------------|-----------------|-----------------|------|-------|--------|--------|-------------------|-----------------------|
| Pu-1at%Ga                          | 36.28           | 26.73           | -               | -               | -               | -               | 33.59           | -               | -               | 22.1 | 29.9  | 0.2039 | 0.7378 | -0.2293           | Expt <sup>61</sup>    |
| $\alpha$ -U                        | 215             | 46              | 22              | 108             | 199             | 267             | 124             | 73              | 74              | 84   | 113   | 0.2019 | 0.7441 | -0.2799           | Expt <sup>62</sup>    |
| $\alpha$ -U                        | 299             | 59              | 30              | 144             | 231             | 364             | 100             | 150             | 132             | 114  | 149   | 0.1933 | 0.7711 | 0.3343            | Calc <sup>62</sup>    |
| $\beta$ -U                         | 220             | 107             | 79              | -               | -               | 201             | 65              | -               | 36              | 57   | 130   | 0.3090 | 0.4378 | 0.3271            | Calc <sup>62</sup>    |
| $\alpha$ -UH <sub>3</sub>          | 217             | 37              | -               | -               | -               | -               | 65              | -               | -               | 74   | 97    | 0.1957 | 0.7635 | -0.2887           | 0GPa <sup>63</sup>    |
| $\alpha$ -UH <sub>3</sub>          | 240             | 42              | -               | -               | -               | -               | 70              | -               | -               | 80   | 108   | 0.2016 | 0.7449 | -0.2593           | 5GPa <sup>63</sup>    |
| $\alpha$ -UH <sub>3</sub>          | 260             | 45              | -               | -               | -               | -               | 66              | -               | -               | 80   | 117   | 0.2200 | 0.6885 | -0.1800           | 10GPa <sup>63</sup>   |
| $\alpha$ -UH <sub>3</sub>          | 274             | 46              | -               | -               | -               | -               | 60              | -               | -               | 78   | 122   | 0.2370 | 0.6378 | -0.1148           | 15GPa <sup>63</sup>   |
| $\alpha$ -UH <sub>3</sub>          | 297             | 61              | -               | -               | -               | -               | 60              | -               | -               | 79   | 140   | 0.2622 | 0.5652 | -0.0072           | 20GPa <sup>63</sup>   |
| $\alpha$ -UH <sub>3</sub>          | 213             | 50              | -               | -               | -               | -               | 48              | -               | -               | 59   | 104   | 0.2607 | 0.5695 | -0.0192           | GGA <sup>64</sup>     |
| $\alpha$ -UH <sub>3</sub>          | 216             | 57              | -               | -               | -               | -               | 50              | -               | -               | 60   | 110   | 0.2684 | 0.5478 | 0.0636            | LDA <sup>64</sup>     |
| $\alpha$ -UH <sub>3</sub>          | 221             | 63              | -               | -               | -               | -               | 53              | -               | -               | 62   | 116   | 0.2719 | 0.5379 | 0.0865            | LDA+U <sup>64</sup>   |
| $\beta$ -UH <sub>3</sub>           | 201             | 92              | -               | -               | -               | -               | 57              | -               | -               | 56   | 128   | 0.3096 | 0.4363 | 0.2727            | LDA <sup>64</sup>     |
| $\beta$ -UH <sub>3</sub>           | 222             | 70              | -               | -               | -               | -               | 58              | -               | -               | 65   | 121   | 0.2727 | 0.5356 | 0.0994            | LDA+U <sup>64</sup>   |
| $\beta$ -UH <sub>3</sub>           | 227             | 102             | -               | -               | -               | -               | 60              | -               | -               | 61   | 144   | 0.3141 | 0.4245 | 0.2923            | GGA <sup>64</sup>     |
| UN                                 | 423.9           | 98.1            | -               | -               | -               | -               | 75.7            | -               | -               | 103  | 207   | 0.2855 | 0.5004 | 0.1084            | Expt <sup>65</sup>    |
| UN                                 | 381             | 113             | -               | -               | -               | -               | 54.6            | -               | -               | 79   | 202   | 0.3273 | 0.3902 | 0.2886            | AFM-SOC <sup>66</sup> |
| UN <sub>2</sub>                    | 495.4           | 137.3           | -               | -               | -               | -               | 65.6            | -               | -               | 99   | 257   | 0.3285 | 0.3874 | 0.2793            | GGA <sup>67</sup>     |
| UN <sub>2</sub>                    | 488.2           | 140.5           | -               | -               | -               | -               | 55.3            | -               | -               | 89   | 256   | 0.3438 | 0.3486 | 0.3438            | GGA+U <sup>67</sup>   |
| UN <sub>2</sub>                    | 483.8           | 146.2           | -               | -               | -               | -               | 41.3            | -               | -               | 76   | 259   | 0.3667 | 0.2927 | 0.4054            | GGA+U <sup>67</sup>   |
| UO <sub>2</sub>                    | 389.3           | 118.7           | -               | -               | -               | -               | 59.7            | -               | -               | 83   | 209   | 0.3238 | 0.3993 | 0.2824            | Expt <sup>68</sup>    |
| UO <sub>2</sub>                    | 369.4           | 112.5           | -               | -               | -               | -               | 61.7            | -               | -               | 83   | 198   | 0.3159 | 0.4196 | 0.2564            | GGA <sup>68</sup>     |
| UO <sub>2</sub>                    | 343.1           | 121.3           | -               | -               | -               | -               | 62.7            | -               | -               | 79   | 195   | 0.3218 | 0.4043 | 0.3001            | GGA+U <sup>68</sup>   |
| UO <sub>2</sub>                    | 440.6           | 141.3           | -               | -               | -               | -               | 88.1            | -               | -               | 109  | 241   | 0.3034 | 0.4525 | 0.2207            | LDA <sup>68</sup>     |
| UO <sub>2</sub>                    | 382.3           | 136.5           | -               | -               | -               | -               | 64.5            | -               | -               | 84   | 218   | 0.3300 | 0.3834 | 0.3269            | LDA+U <sup>68</sup>   |
| UO <sub>2</sub>                    | 386.4           | 118.0           | -               | -               | -               | -               | 63.9            | -               | -               | 86.4 | 207   | 0.3171 | 0.4166 | 0.2608            | RT <sup>69</sup>      |
| UO <sub>2</sub>                    | 317.9           | 118.3           | -               | -               | -               | -               | 59.8            | -               | -               | 73.5 | 184.8 | 0.3244 | 0.3977 | 0.3165            | 1200K <sup>69</sup>   |
| UO <sub>2</sub>                    | 253.9           | 96.2            | -               | -               | -               | -               | 49.6            | -               | -               | 59.8 | 148.8 | 0.3228 | 0.4018 | 0.3132            | 2060K <sup>69</sup>   |
| UO <sub>2</sub>                    | 233.3           | 80.4            | -               | -               | -               | -               | 48.2            | -               | -               | 58.0 | 131.4 | 0.3075 | 0.4417 | 0.2451            | 2250K <sup>69</sup>   |
| UO <sub>2</sub>                    | 219.5           | 90.7            | -               | -               | -               | -               | 43.0            | -               | -               | 50.6 | 133.6 | 0.3320 | 0.3785 | 0.3569            | 2370K <sup>69</sup>   |
| UO <sub>2</sub>                    | 217.3           | 97.2            | -               | -               | -               | -               | 43.0            | -               | -               | 49.2 | 137.2 | 0.3399 | 0.3583 | 0.3949            | 2460K <sup>69</sup>   |
| UO <sub>2</sub>                    | 212.8           | 92.6            | -               | -               | -               | -               | 40.7            | -               | -               | 47.6 | 132.7 | 0.3398 | 0.3588 | 0.3912            | 2580K <sup>69</sup>   |
| UO <sub>2</sub>                    | 196.7           | 94.5            | -               | -               | -               | -               | 36.4            | -               | -               | 41.7 | 128.6 | 0.3536 | 0.3244 | 0.4519            | 2670K <sup>69</sup>   |
| UO <sub>2</sub>                    | 178.3           | 93.6            | -               | -               | -               | -               | 32.7            | -               | -               | 36.3 | 121.8 | 0.3646 | 0.2977 | 0.4999            | 2760K <sup>69</sup>   |
| UO <sub>2</sub>                    | 146.1           | 78.7            | -               | -               | -               | -               | 27.5            | -               | -               | 29.8 | 88.5  | 0.3485 | 0.3371 | 0.5786            | 2930K <sup>69</sup>   |
| UC                                 | 315             | 77              | -               | -               | -               | -               | 61              | -               | -               | 80   | 156   | 0.2815 | 0.5116 | 0.1023            | Expt <sup>70</sup>    |
| UC                                 | 315             | 136             | -               | -               | -               | -               | 72              | -               | -               | 79   | 196   | 0.3230 | 0.4015 | 0.3271            | GGA+U <sup>70</sup>   |
| UC <sub>2</sub>                    | 292             | 154             | 58              | -               | -               | 512             | 46              | -               | 143             | 87   | 180   | 0.2927 | 0.4812 | 0.0637            | GGA+U <sup>71</sup>   |
| U <sub>2</sub> C <sub>3</sub>      | 383             | 121             | -               | -               | -               | -               | 91              | -               | -               | 105  | 208   | 0.2837 | 0.5056 | 0.1440            | GGA+U <sup>71</sup>   |
| UB <sub>2</sub>                    | 450.4           | 58.6            | 102.3           | -               | -               | 497.2           | 262.6           | -               | 195.9           | 217  | 213   | 0.1197 | 1.0188 | -0.6986           | This work             |
| UB <sub>4</sub>                    | 558.4           | 118.9           | 80.9            | -               | -               | 569.1           | 223             | -               | 226.4           | 228  | 250   | 0.1500 | 0.9130 | -0.4998           | This work             |
| UB <sub>12</sub>                   | 488.9           | 118.1           | -               | -               | -               | -               | 254.1           | -               | -               | 224  | 242   | 0.1460 | 0.9267 | -0.5628           | This work(0GPa)       |
| UB <sub>12</sub>                   | 673.1           | 212.2           | -               | -               | -               | -               | 329.3           | -               | -               | 285  | 366   | 0.1904 | 0.7802 | -0.3201           | This work(50GPa)      |
| UB <sub>12</sub>                   | 807.8           | 295.1           | -               | -               | -               | -               | 392.1           | -               | -               | 331  | 466   | 0.2131 | 0.7096 | -0.2081           | This work(100GPa)     |
| U <sub>2</sub> Ti                  | 293.6           | 81              | 28.2            | -               | -               | 310             | 133.9           | -               | 106.3           | 124  | 130   | 0.1375 | 0.9562 | -0.5037           | This work             |
| U <sub>2</sub> Ti                  | 285             | 74              | 28              | -               | -               | 300             | 129             | -               | 105.5           | 121  | 125   | 0.1346 | 0.9661 | -0.5282           | Calc <sup>72</sup>    |
| U <sub>2</sub> Ti                  | 295.1           | 89.4            | 30.1            | -               | -               | 310.8           | 128             | -               | 102.9           | 120  | 133   | 0.1520 | 0.9063 | -0.4182           | Calc <sup>72</sup>    |
| U <sub>2</sub> Ti                  | 464.3           | 189.3           | 71.4            | -               | -               | 489.3           | 167.9           | -               | 137.5           | 164  | 231   | 0.2121 | 0.7125 | 0.0969            | 20GPa <sup>72</sup>   |
| U <sub>2</sub> Ti                  | 603.6           | 285.7           | 117.9           | -               | -               | 657.1           | 200             | -               | 159.0           | 197  | 322   | 0.2465 | 0.6101 | 0.0692            | 40GPa <sup>72</sup>   |
| U <sub>2</sub> Ti                  | 664.3           | 332.1           | 139.3           | -               | -               | 732.1           | 214.3           | -               | 166.1           | 210  | 364   | 0.2583 | 0.5764 | 0.1251            | 50GPa <sup>72</sup>   |
| U <sub>2</sub> Ti                  | 928.6           | 571.4           | 246.4           | -               | -               | 1150            | 128             | -               | 178.6           | 195  | 570   | 0.3468 | 0.3412 | 0.4483            | 100GPa <sup>72</sup>  |
| NpN                                | 402             | 140             | -               | -               | -               | -               | 38.4            | -               | -               | 64   | 227   | 0.3704 | 0.2837 | 0.4469            | NM <sup>66</sup>      |
| NpN                                | 331             | 54.2            | -               | -               | -               | -               | 79.1            | -               | -               | 99   | 140   | 0.2129 | 0.7100 | 0.1783            | FM <sup>66</sup>      |
| NpN                                | 341             | 97.7            | -               | -               | -               | -               | 60.8            | -               | -               | 81   | 170   | 0.2957 | 0.4731 | 0.2167            | AFM <sup>66</sup>     |
| NpN                                | 359             | 112             | -               | -               | -               | -               | 50.4            | -               | -               | 73   | 194   | 0.3334 | 0.3748 | 0.3170            | NM-SOC <sup>66</sup>  |
| NpN                                | 330             | 86.4            | -               | -               | -               | -               | 60.7            | -               | -               | 81   | 168   | 0.2929 | 0.4805 | 0.1533            | FM-SOC <sup>66</sup>  |
| NpN                                | 339             | 94.2            | -               | -               | -               | -               | 61.8            | -               | -               | 82   | 176   | 0.2991 | 0.4639 | 0.1843            | AFM-SOC <sup>66</sup> |
| PuN                                | 280             | 89.6            | -               | -               | -               | -               | 66.2            | -               | -               | 74   | 147   | 0.2852 | 0.5013 | 0.1596            | AFM-SOC <sup>66</sup> |
| Ce                                 | 28              | 17              | -               | -               | -               | -               | 15              | -               | -               | 11.2 | 21    | 0.2705 | 0.5419 | 0.0968            | Calc <sup>73</sup>    |
| Ce                                 | 37.9            | 26.4            | -               | -               | -               | -               | 20.9            | -               | -               | 14.8 | 30.2  | 0.2891 | 0.4908 | 0.1819            | Calc <sup>73</sup>    |
| CeH <sub>2</sub> -CaF <sub>2</sub> | 84              | 52              | -               | -               | -               | -               | 27              | -               | -               | 21.9 | 62.7  | 0.3436 | 0.3493 | 0.3989            | Calc <sup>73</sup>    |
| CeH <sub>2</sub> -CaF <sub>2</sub> | 87.6            | 55              | -               | -               | -               | -               | 37              | -               | -               | 26.6 | 65.9  | 0.3219 | 0.4043 | 0.2733            | Expt <sup>73</sup>    |
| CeH <sub>2</sub> -FeS <sub>2</sub> | 118             | 31              | -               | -               | -               | -               | 33              | -               | -               | 36.9 | 60.0  | 0.2450 | 0.6144 | -0.0333           | Calc <sup>73</sup>    |
| CeH <sub>2</sub> -AlB <sub>2</sub> | 90              | 21              | 33              | -               | -               | 51.55           | 33              | -               | -               | 23.6 | 51.0  | 0.2992 | 0.4635 | 0.1128            | Calc <sup>73</sup>    |
| CeH <sub>2</sub> -ReB <sub>2</sub> | 114             | 41              | 18              | -               | -               | 56.11           | 12              | -               | -               | 30.4 | 56.0  | 0.2705 | 0.5418 | 0.0937            | Calc <sup>73</sup>    |
| CeH <sub>3</sub> -BiF <sub>3</sub> | 96              | 35              | -               | -               | -               | -               | 19              | -               | -               | 23.0 | 55.3  | 0.3175 | 0.4154 | 0.2892            | Calc <sup>73</sup>    |
| CeH <sub>3</sub> -ReO <sub>3</sub> | 71              | 49              | -               | -               | -               | -               | 9               | -               | -               | 9.8  | 56.3  | 0.4181 | 0.1731 | 0.7101            | Calc <sup>73</sup>    |
| CeH <sub>3</sub> -P-3C1            | 89              | 20.8            | 21              | -               | -               | 104             | 23              | -               | -               | 30.6 | 45.2  | 0.2289 | 0.6619 | -0.1693           | Calc <sup>73</sup>    |



TABLE VIII: The elastic properties (in GPa) of some intermetallic compounds under the pressure and temperature, as well as experimental results.

|                                   | C <sub>11</sub> | C <sub>12</sub> | C <sub>13</sub> | C <sub>23</sub> | C <sub>22</sub> | C <sub>33</sub> | C <sub>44</sub> | C <sub>55</sub> | C <sub>66</sub> | G     | B      | $\nu$  | G/B    | Cauchy Pressure/B | Note                    |
|-----------------------------------|-----------------|-----------------|-----------------|-----------------|-----------------|-----------------|-----------------|-----------------|-----------------|-------|--------|--------|--------|-------------------|-------------------------|
| ZrB <sub>12</sub>                 | 443             | 129             | -               | -               | -               | -               | 265             | -               | -               | 215   | 234    | 0.1482 | 0.9193 | -0.5820           | Expt <sup>74</sup>      |
| ZrB <sub>12</sub>                 | 437.9           | 146.3           | -               | -               | -               | -               | 256.2           | -               | -               | 204   | 244    | 0.1721 | 0.8392 | -0.4513           | 0GPa <sup>74</sup>      |
| ZrB <sub>12</sub>                 | 483.6           | 174.8           | -               | -               | -               | -               | 275             | -               | -               | 218   | 278    | 0.1888 | 0.7855 | -0.3608           | 10GPa <sup>74</sup>     |
| ZrB <sub>12</sub>                 | 527.6           | 203.6           | -               | -               | -               | -               | 291.4           | -               | -               | 230   | 312    | 0.2036 | 0.7389 | -0.2818           | 20GPaCalc <sup>74</sup> |
| ZrB <sub>12</sub>                 | 611.5           | 322.1           | -               | -               | -               | -               | 258.8           | -               | -               | 253   | 376    | 0.2255 | 0.6720 | -0.1682           | 40GPaCalc <sup>74</sup> |
| ZrB <sub>12</sub>                 | 651.7           | 285.0           | -               | -               | -               | -               | 335.3           | -               | -               | 263   | 407    | 0.2341 | 0.6462 | -0.1235           | 50GPaCalc <sup>74</sup> |
| HfB <sub>12</sub>                 | 436.4           | 156.1           | -               | -               | -               | -               | 250.8           | -               | -               | 199   | 250    | 0.1855 | 0.7958 | -0.3795           | 0GPaCalc <sup>74</sup>  |
| HfB <sub>12</sub>                 | 483.1           | 185.8           | -               | -               | -               | -               | 267.6           | -               | -               | 211   | 285    | 0.2026 | 0.7419 | -0.2871           | 10GPaCalc <sup>74</sup> |
| HfB <sub>12</sub>                 | 530.1           | 213.9           | -               | -               | -               | -               | 285.1           | -               | -               | 225   | 315    | 0.2146 | 0.7048 | -0.2230           | 20GPaCalc <sup>74</sup> |
| HfB <sub>12</sub>                 | 618.5           | 270.4           | -               | -               | -               | -               | 315.4           | -               | -               | 248   | 386    | 0.2353 | 0.6430 | -0.1164           | 40GPaCalc <sup>74</sup> |
| HfB <sub>12</sub>                 | 661.4           | 296.4           | -               | -               | -               | -               | 328.1           | -               | -               | 259   | 418    | 0.2430 | 0.6202 | -0.0758           | 50GPaCalc <sup>74</sup> |
| LuB <sub>12</sub>                 | 460.4           | 114.7           | -               | -               | -               | -               | 248             | -               | -               | 215   | 230    | 0.1441 | 0.9333 | -0.5797           | 0GPaCalc <sup>74</sup>  |
| LuB <sub>12</sub>                 | 504.8           | 138.4           | -               | -               | -               | -               | 268.5           | -               | -               | 230   | 261    | 0.1585 | 0.8842 | -0.4994           | 10GPaCalc <sup>74</sup> |
| LuB <sub>12</sub>                 | 554.3           | 167.0           | -               | -               | -               | -               | 284.4           | -               | -               | 244   | 296    | 0.1770 | 0.8234 | -0.3965           | 20GPaCalc <sup>74</sup> |
| LuB <sub>12</sub>                 | 638.9           | 219.0           | -               | -               | -               | -               | 316             | -               | -               | 268   | 359    | 0.2009 | 0.7472 | -0.2702           | 40GPaCalc <sup>74</sup> |
| LuB <sub>12</sub>                 | 679.3           | 243.1           | -               | -               | -               | -               | 328.1           | -               | -               | 279   | 389    | 0.2107 | 0.7170 | -0.2188           | 50GPaCalc <sup>74</sup> |
| YB <sub>12</sub>                  | 464.3           | 107.4           | -               | -               | -               | -               | 252             | -               | -               | 219   | 226    | 0.1337 | 0.9695 | -0.6388           | 0GPaCalc <sup>74</sup>  |
| YB <sub>12</sub>                  | 513.1           | 135.2           | -               | -               | -               | -               | 270.4           | -               | -               | 234   | 266    | 0.1600 | 0.8792 | -0.5075           | 10GPaCalc <sup>74</sup> |
| YB <sub>12</sub>                  | 559.3           | 161.5           | -               | -               | -               | -               | 287.8           | -               | -               | 248   | 294    | 0.1707 | 0.8439 | -0.4294           | 20GPaCalc <sup>74</sup> |
| YB <sub>12</sub>                  | 646             | 214.5           | -               | -               | -               | -               | 287.8           | -               | -               | 272   | 358    | 0.1972 | 0.7587 | -0.2869           | 40GPaCalc <sup>74</sup> |
| YB <sub>12</sub>                  | 686.9           | 241.1           | -               | -               | -               | -               | 330.9           | -               | -               | 282   | 390    | 0.2081 | 0.7247 | -0.2304           | 50GPaCalc <sup>74</sup> |
| $\gamma$ -TiAl                    | 186.6           | 75.0            | 75.0            | -               | -               | 182.9           | 108.8           | -               | 81.2            | 78.3  | 111.8  | 0.2162 | 0.7001 | -0.1789           | 0K <sup>75</sup>        |
| $\gamma$ -TiAl                    | 182.8           | 75.2            | 75.0            | -               | -               | 176.9           | 103.5           | -               | 81.2            | 74.5  | 110.3  | 0.2243 | 0.6756 | -0.1351           | 298K <sup>75</sup>      |
| $\gamma$ -TiAl                    | 179.7           | 75.3            | 75.3            | -               | -               | 173.7           | 100.5           | -               | 74.4            | 72.3  | 109.4  | 0.2293 | 0.6608 | -0.1110           | 443K <sup>75</sup>      |
| $\gamma$ -TiAl                    | 178.0           | 75.6            | 75.5            | -               | -               | 172.1           | 99.0            | -               | 73.3            | 71.1  | 109.0  | 0.2321 | 0.6523 | -0.0972           | 523K <sup>75</sup>      |
| $\gamma$ -TiAl                    | 172.5           | 75.2            | 75.7            | -               | -               | 167.3           | 94.8            | -               | 70.6            | 67.9  | 107.3  | 0.2387 | 0.6329 | -0.0676           | 723K <sup>75</sup>      |
| $\gamma$ -TiAl                    | 150.3           | 76.0            | 76.0            | -               | -               | 152.6           | 81.6            | -               | 63.8            | 56.9  | 101.0  | 0.2627 | 0.5638 | 0.0327            | 1273K <sup>75</sup>     |
| S-ZnO                             | 189.8           | 102.2           | 93.7            | -               | -               | 199.1           | 45.2            | -               | 43.8            | 46.0  | 128.7  | 0.3402 | 0.3576 | 0.4155            | Calc <sup>76</sup>      |
| S-ZnO                             | 190             | 110             | 90              | -               | -               | 196             | 39              | -               | 40              | 42.3  | 128.4  | 0.3516 | 0.3293 | 0.4713            | Expt <sup>76</sup>      |
| V <sub>o</sub> <sup>0</sup> -1    | 182.0           | 96.8            | 82.7            | -               | -               | 192.8           | 44.5            | -               | 42.6            | 45.7  | 120.1  | 0.3311 | 0.3807 | 0.3846            | Calc <sup>76</sup>      |
| V <sub>o</sub> <sup>2+</sup> -1   | 180.7           | 112.1           | 97.5            | -               | -               | 192.4           | 35.9            | -               | 34.3            | 37.4  | 129.8  | 0.3686 | 0.2879 | 0.5371            | Calc <sup>76</sup>      |
| V <sub>o</sub> <sup>0</sup> -2    | 169.2           | 88.0            | 87.3            | -               | -               | 163.5           | 38.3            | -               | 40.6            | 39.4  | 114.1  | 0.3452 | 0.5638 | 0.4224            | Calc <sup>76</sup>      |
| ReB <sub>2</sub>                  | 682             | 188             | 131             | -               | -               | 1118            | 290             | -               | 247             | 294.1 | 369.6  | 0.1855 | 0.7958 | -0.2949           | Calc <sup>77</sup>      |
| 0.32B <sub>v</sub>                | 629             | 167             | 135             | -               | -               | 1006            | 266             | -               | 231             | 269.4 | 342.8  | 0.1887 | 0.7857 | -0.2844           | Calc <sup>77</sup>      |
| 0.65B <sub>v</sub>                | 596             | 167             | 182             | -               | -               | 922             | 227             | -               | 214             | 236.0 | 346.0  | 0.2221 | 0.6821 | -0.1329           | Calc <sup>77</sup>      |
| 1.30B <sub>v</sub>                | 543             | 170             | 226             | -               | -               | 667             | 195             | -               | 186             | 190.2 | 329.9  | 0.2582 | 0.5766 | 0.0227            | Calc <sup>77</sup>      |
| HA                                | 137.2           | 44.5            | 57.8            | -               | -               | 164.8           | 42.3            | -               | 46.35           | 44.7  | 83.7   | 0.2734 | 0.5337 | 0.0815            | Calc <sup>78</sup>      |
| HA                                | 137             | 42.5            | 54.9            | -               | -               | 172             | 39.6            | -               | 47.25           | 44.6  | 82.6   | 0.2713 | 0.5397 | 0.0639            | Expt <sup>78</sup>      |
| HA-V <sub>H</sub>                 | 129.0           | 27.6            | 69.5            | -               | -               | 158.6           | 47.8            | -               | 50.7            | 44.8  | 80.4   | 0.2648 | 0.5578 | -0.0087           | Calc <sup>78</sup>      |
| HA-V <sub>O</sub>                 | 113.7           | 43.5            | 47.1            | -               | -               | 163.9           | 39.9            | -               | 35.1            | 39.5  | 72.9   | 0.2709 | 0.5409 | 0.1069            | Calc <sup>78</sup>      |
| HA-V <sub>OH</sub>                | 109.0           | 28.4            | 62.7            | -               | -               | 160.1           | 42.1            | -               | 40.3            | 39.2  | 72.3   | 0.2701 | 0.5429 | 0.0602            | Calc <sup>78</sup>      |
| HA-V <sub>Ca1</sub> <sup>2+</sup> | 116.2           | 53.4            | 40.7            | -               | -               | 156.0           | 31.7            | -               | 31.4            | 35.1  | 72.9   | 0.2925 | 0.4816 | 0.2128            | Calc <sup>78</sup>      |
| HA-V <sub>Ca2</sub> <sup>2+</sup> | 77.0            | 21.9            | 70.4            | -               | -               | 119.1           | 34.1            | -               | 27.55           | 26.5  | 66.5   | 0.3241 | 0.3984 | 0.4609            | Calc <sup>78</sup>      |
| Ni                                | 246.58          | 147.24          | -               | -               | -               | -               | 124.97          | -               | -               | 94.85 | 180.35 | 0.2763 | 0.5259 | 0.1235            | MD <sup>79</sup>        |
| Ni-1at%H                          | 246.74          | 148.04          | -               | -               | -               | -               | 122.56          | -               | -               | 93.28 | 180.94 | 0.2800 | 0.5155 | 0.1408            | MD <sup>79</sup>        |
| Ni-2at%H                          | 246.93          | 148.81          | -               | -               | -               | -               | 120.20          | -               | -               | 91.74 | 181.52 | 0.2827 | 0.5082 | 0.1576            | MD <sup>79</sup>        |
| Ni-3at%H                          | 247.13          | 149.57          | -               | -               | -               | -               | 117.83          | -               | -               | 90.21 | 182.09 | 0.2874 | 0.4954 | 0.1743            | MD <sup>79</sup>        |
| Ni-4at%H                          | 247.33          | 150.34          | -               | -               | -               | -               | 115.46          | -               | -               | 88.67 | 182.67 | 0.2911 | 0.4854 | 0.1909            | MD <sup>79</sup>        |
| Ni-5at%H                          | 247.53          | 151.1           | -               | -               | -               | -               | 113.10          | -               | -               | 87.15 | 183.24 | 0.2947 | 0.4756 | 0.2074            | MD <sup>79</sup>        |
| PbTiO <sub>3</sub>                | 235             | 101             | 98.8            | -               | -               | 105             | 65              | -               | 104             | 56.5  | 130.2  | 0.2853 | 0.5011 | 0.1282            | Expt <sup>80</sup>      |
| BaTiO <sub>3</sub>                | 211             | 107             | 114             | -               | -               | 160             | 56.2            | -               | 127             | 58.2  | 137.9  | 0.3152 | 0.4216 | 0.1370            | Expt <sup>80</sup>      |
| Ti                                | 176.1           | 86.9            | 68.3            | -               | -               | 190.5           | 50.8            | -               | 44.6            | 50.2  | 109.9  | 0.3020 | 0.4562 | 0.2719            | 4K <sup>81</sup>        |
| Ti                                | 162.4           | 92.0            | 69.0            | -               | -               | 180.7           | 46.7            | -               | 35.2            | 43.4  | 107.3  | 0.3219 | 0.4042 | 0.3687            | 298K <sup>81</sup>      |
| Ti                                | 152.2           | 94.3            | 69.5            | -               | -               | 173.4           | 43.4            | -               | 28.5            | 38.2  | 104.9  | 0.3375 | 0.3644 | 0.3749            | 473K <sup>81</sup>      |
| Ti                                | 129.9           | 99.2            | 68.8            | -               | -               | 157.6           | 33.7            | -               | 15.4            | 26.1  | 98.9   | 0.3788 | 0.2637 | 0.5185            | 923K <sup>81</sup>      |
| Ti                                | 97.7            | 82.7            | -               | -               | -               | -               | 37.5            | -               | 25.5            | 87.7  | 137.9  | 0.3675 | 0.2908 | 0.5154            | 1273 K <sup>82</sup>    |

TABLE IX: The elastic properties (in GPa) of potential structural materials for nuclear reactors, as well as experimental results.

|                                            | C <sub>11</sub> | C <sub>12</sub> | C <sub>13</sub> | C <sub>33</sub> | C <sub>44</sub> | C <sub>66</sub> | G    | B     | $\nu$  | G/B    | Cauchy Pressure/B | Note                |
|--------------------------------------------|-----------------|-----------------|-----------------|-----------------|-----------------|-----------------|------|-------|--------|--------|-------------------|---------------------|
| ZrC                                        | 470             | 100             |                 |                 | 160             | -               | 170  | 223   | 0.1970 | 0.7593 | -0.2687           | Expt <sup>83</sup>  |
| SiC                                        | 390             | 142             |                 |                 | 256             | -               | 191  | 225   | 0.1683 | 0.8518 | -0.5074           | Expt <sup>14</sup>  |
| SiC                                        | 420             | 126             |                 |                 | 287             | -               | 219  | 224   | 0.1308 | 0.9795 | -0.7188           | Expt <sup>15</sup>  |
| Ti <sub>2</sub> SC                         | -               | -               | -               | -               | -               | -               | 125  | 145   | 0.16   | -      | -                 | Expt <sup>84</sup>  |
| $\alpha$ -Ti <sub>3</sub> SiC <sub>2</sub> | 360             | 84              | 101             | 350             | 158             | 1380            | 142  | 182   | 0.1910 | 0.7784 | -0.3054           | FLAPW <sup>85</sup> |
| $\beta$ -Ti <sub>3</sub> SiC <sub>2</sub>  | 360             | 86              | 89              | 348             | 120             | 1370            | 129  | 177   | 0.2077 | 0.7262 | -0.2312           | FLAPW <sup>85</sup> |
| Fe-19Cr-10Ni                               | 204.6           | 137.7           | -               | -               | 126.2           | -               | 89.1 | 160   | 0.2652 | 0.5569 | 0.0719            | Expt <sup>86</sup>  |
| Fe-12Cr-12Ni                               | 210.9           | 140.3           | -               | -               | 122.5           | -               | 88   | 164   | 0.2730 | 0.5349 | 0.1086            | Expt <sup>86</sup>  |
| Fe-12Cr-18Ni                               | 233.2           | 162.7           | -               | -               | 122.6           | -               | 88   | 168   | 0.2965 | 0.4708 | 0.2153            | Expt <sup>86</sup>  |
| Fe-18Cr-8Ni                                | 209             | 133.0           | -               | -               | 121             | -               | 88   | 153   | 0.2595 | 0.5727 | 0.0758            | Expt <sup>87</sup>  |
| Fe-18Cr-12Ni                               | 191.2           | 117.9           | -               | -               | 138.6           | -               | 98   | 142   | 0.2204 | 0.6874 | -0.1454           | Expt <sup>86</sup>  |
| Fe-18Cr-12Ni                               | 215.9           | 144.6           | -               | -               | 128.9           | -               | 89.1 | 160   | 0.2652 | 0.5569 | 0.0719            | Expt <sup>86</sup>  |
| Fe-18Cr-14Ni                               | 198             | 125             | -               | -               | 122             | -               | 88   | 149.3 | 0.2542 | 0.5881 | 0.0201            | Expt <sup>86</sup>  |
| Fe-18Cr-19Ni                               | 191             | 119             | -               | -               | 124             | -               | 89   | 143   | 0.2428 | 0.6210 | -0.0350           | Expt <sup>86</sup>  |
| Fe-19Cr-10Ni                               | 207             | 132             | -               | -               | 123             | -               | 89.1 | 157   | 0.2621 | 0.5656 | 0.0573            | Expt <sup>86</sup>  |
| Fe-19Cr-14Ni                               | 205             | 133             | -               | -               | 127             | -               | 91   | 157   | 0.2580 | 0.5771 | 0.0382            | Expt <sup>86</sup>  |
| Fe-19Cr-19Ni                               | 204             | 133             | -               | -               | 126             | -               | 89   | 156.7 | 0.2594 | 0.5731 | 0.0447            | Expt <sup>86</sup>  |
| Fe-19Cr-24Ni                               | 215.2           | 144.0           | -               | -               | 125.8           | -               | 90   | 168   | 0.2730 | 0.5350 | 0.1085            | Expt <sup>87</sup>  |
| Fe                                         | 276             | 173.5           | -               | -               | 136.3           | -               | 102  | 208   | 0.2885 | 0.4924 | 0.1719            | Expt <sup>86</sup>  |
| Co                                         | 239.8           | 163.4           | -               | -               | 133.4           | -               | 95   | 189   | 0.2841 | 0.5045 | 0.1588            | Expt <sup>86</sup>  |
| Ni                                         | 251.6           | 154.4           | -               | -               | 122.0           | -               | 93   | 187   | 0.2873 | 0.4957 | 0.1734            | Expt <sup>86</sup>  |
| Fe-15Cr-15Ni                               | 215.0           | 137             | -               | -               | 136             | -               | 97.2 | 163   | 0.2513 | 0.5963 | 0.0061            | 195K <sup>87</sup>  |
| Fe-15Cr-15Ni                               | 214.9           | 137             | -               | -               | 135             | -               | 96.6 | 163   | 0.2526 | 0.5926 | 0.0123            | 200K <sup>87</sup>  |
| Fe-15Cr-15Ni                               | 214.7           | 137             | -               | -               | 134             | -               | 95.9 | 163   | 0.2541 | 0.5883 | 0.0184            | 220K <sup>87</sup>  |
| Fe-15Cr-15Ni                               | 214.6           | 137             | -               | -               | 133             | -               | 95.3 | 162.8 | 0.2551 | 0.5739 | 0.0246            | 230K <sup>87</sup>  |
| Fe-15Cr-15Ni                               | 213.1           | 137             | -               | -               | 133             | -               | 95.0 | 162.4 | 0.2552 | 0.5853 | 0.0246            | 240K <sup>87</sup>  |
| Fe-15Cr-15Ni                               | 213.2           | 137             | -               | -               | 132             | -               | 94.4 | 162.4 | 0.2565 | 0.5813 | 0.0308            | 250K <sup>87</sup>  |
| Fe-15Cr-15Ni                               | 212.6           | 137             | -               | -               | 132             | -               | 94.3 | 162.2 | 0.2565 | 0.5814 | 0.0308            | 260K <sup>87</sup>  |
| Fe-15Cr-15Ni                               | 212.1           | 137             | -               | -               | 132             | -               | 94.2 | 162.0 | 0.2565 | 0.5815 | 0.0309            | 270K <sup>87</sup>  |
| Fe-15Cr-15Ni                               | 211.8           | 137             | -               | -               | 131             | -               | 93.6 | 161.9 | 0.2576 | 0.5781 | 0.0371            | 280K <sup>87</sup>  |
| Fe-15Cr-15Ni                               | 211.4           | 137             | -               | -               | 131             | -               | 93.5 | 161.8 | 0.2577 | 0.5797 | 0.0371            | 290K <sup>87</sup>  |
| Fe-15Cr-15Ni                               | 211             | 137             | -               | -               | 130             | -               | 93   | 162   | 0.2591 | 0.5739 | 0.0433            | 295K <sup>87</sup>  |
| Ti <sub>2</sub> AlB                        | 196.4           | 87.1            | 58.0            | 209.0           | 75.3            | 54.7            | 67   | 112   | 0.2512 | 0.5963 | 0.0674            | PAW <sup>88</sup>   |
| Zr <sub>2</sub> AlB                        | 176.7           | 70.0            | 51.4            | 175.7           | 52.0            | 53.4            | 55   | 97    | 0.2617 | 0.5667 | 0.0824            | PAW <sup>88</sup>   |
| Hf <sub>2</sub> AlB                        | 203.8           | 76.5            | 58.5            | 200             | 67.5            | 63.7            | 67   | 110   | 0.2469 | 0.6990 | 0.0172            | PAW <sup>88</sup>   |
| V <sub>2</sub> AlB                         | 285.1           | 85.7            | 97.7            | 278.5           | 138.8           | 99.7            | 111  | 157   | 0.2127 | 0.7108 | -0.1757           | PAW <sup>88</sup>   |
| Nb <sub>2</sub> AlB                        | 283.6           | 91.4            | 101.7           | 249.2           | 125.3           | 96.1            | 101  | 160   | 0.2400 | 0.6280 | -0.0603           | PAW <sup>88</sup>   |
| Ta <sub>2</sub> AlB                        | 325.5           | 96.8            | 113.0           | 276.2           | 140.6           | 114.4           | 118  | 175   | 0.2249 | 0.6735 | -0.1295           | PAW <sup>88</sup>   |
| Cr <sub>2</sub> AlB                        | 298.8           | 81.9            | 129.8           | 289.6           | 157.4           | 108.5           | 121  | 174   | 0.2177 | 0.6954 | -0.1557           | PAW <sup>88</sup>   |
| Mo <sub>2</sub> AlB                        | 316.6           | 105.4           | 151.7           | 268.7           | 161.1           | 105.6           | 118  | 191   | 0.2438 | 0.6199 | -0.0251           | PAW <sup>88</sup>   |
| Sc <sub>2</sub> AlC                        | 179.2           | 65.3            | 34.2            | 194.5           | 45.2            | 57.0            | 56   | 91    | 0.2447 | 0.6154 | -0.0148           | PAW <sup>88</sup>   |
| Ti <sub>2</sub> AlC                        | 304.4           | 65.4            | 64.0            | 269.9           | 105.7           | 119.5           | 112  | 140   | 0.1857 | 0.7953 | -0.3412           | PAW <sup>88</sup>   |
| Zr <sub>2</sub> AlC                        | 259.2           | 64.7            | 63.3            | 225.3           | 85.0            | 97.3            | 90   | 125   | 0.2093 | 0.7212 | -0.2174           | PAW <sup>88</sup>   |
| Hf <sub>2</sub> AlC                        | 291.1           | 74.5            | 72.2            | 255.0           | 99.2            | 108.3           | 102  | 141   | 0.2083 | 0.7243 | -0.2150           | PAW <sup>88</sup>   |
| V <sub>2</sub> AlC                         | 330.2           | 74.3            | 107.1           | 321.1           | 149.3           | 128.0           | 130  | 173   | 0.1991 | 0.7529 | -0.2771           | PAW <sup>88</sup>   |
| Nb <sub>2</sub> AlC                        | 318.9           | 89.4            | 120.8           | 296.5           | 141.2           | 114.8           | 118  | 177   | 0.2282 | 0.6639 | -0.1291           | PAW <sup>88</sup>   |
| Ta <sub>2</sub> AlC                        | 349.0           | 125.3           | 132.2           | 338.2           | 153.3           | 111.9           | 125  | 202   | 0.2432 | 0.6197 | -0.0191           | PAW <sup>88</sup>   |
| Cr <sub>2</sub> AlC                        | 369.8           | 86.1            | 108.7           | 362.5           | 142.9           | 141.9           | 139  | 190   | 0.2065 | 0.7298 | -0.2370           | PAW <sup>88</sup>   |
| Mo <sub>2</sub> AlC                        | 354.4           | 98.0            | 146.6           | 359.0           | 144.4           | 128.2           | 127  | 205   | 0.2431 | 0.6199 | -0.0683           | PAW <sup>88</sup>   |
| Sc <sub>2</sub> AlN                        | 210.3           | 69.6            | 54.0            | 217.7           | 70.9            | 70.4            | 73   | 110   | 0.2291 | 0.6613 | -0.0802           | PAW <sup>88</sup>   |
| Ti <sub>2</sub> AlN                        | 316.2           | 69.7            | 94.7            | 291.3           | 127.9           | 123.3           | 120  | 160   | 0.2012 | 0.7461 | -0.2709           | PAW <sup>88</sup>   |
| Zr <sub>2</sub> AlN                        | 268.8           | 76.9            | 87.2            | 243.5           | 109.1           | 96.0            | 98   | 1143  | 0.2215 | 0.6842 | -0.3054           | PAW <sup>88</sup>   |
| Hf <sub>2</sub> AlN                        | 307.4           | 84.5            | 103.1           | 268.4           | 124.5           | 111.5           | 111  | 163   | 0.2229 | 0.6799 | -0.1488           | PAW <sup>88</sup>   |
| V <sub>2</sub> AlN                         | 301.7           | 44.8            | 131.4           | 331.7           | 143.1           | 128.5           | 121  | 169   | 0.2105 | 0.7175 | -0.2820           | PAW <sup>88</sup>   |
| Nb <sub>2</sub> AlN                        | 340.4           | 149.9           | 110.6           | 332.3           | 147.7           | 95.3            | 119  | 195   | 0.2468 | 0.6095 | 0.0449            | PAW <sup>88</sup>   |
| Ta <sub>2</sub> AlN                        | 351.9           | 174.1           | 142.8           | 372.5           | 160.0           | 88.9            | 119  | 222   | 0.2727 | 0.5359 | 0.1533            | PAW <sup>88</sup>   |
| Cr <sub>2</sub> AlN                        | 286.7           | 74.9            | 144.5           | 376.7           | 88.2            | 105.9           | 95   | 181   | 0.2764 | 0.5256 | 0.0599            | PAW <sup>88</sup>   |
| Ti <sub>3</sub> AlC <sub>2</sub>           | 368             | 81              | 76              | 313             | 130             | 143             | 135  | 168   | 0.1833 | 0.8029 | -0.3456           | PAW <sup>89</sup>   |
| Zr <sub>3</sub> AlC <sub>2</sub>           | 322             | 73              | 75              | 270             | 106             | 124             | 113  | 151   | 0.2003 | 0.7490 | -0.3385           | PAW <sup>89</sup>   |
| Hf <sub>3</sub> AlC <sub>2</sub>           | 357             | 82              | 83              | 283             | 126             | 138             | 127  | 165   | 0.1930 | 0.7722 | -0.3000           | PAW <sup>89</sup>   |
| V <sub>3</sub> AlC <sub>2</sub>            | 415             | 88              | 113             | 361             | 163             | 163             | 156  | 202   | 0.1936 | 0.7701 | -0.3094           | PAW <sup>89</sup>   |
| Nb <sub>3</sub> AlC <sub>2</sub>           | 331             | 131             | 126             | 321             | 137             | 100             | 113  | 194   | 0.2556 | 0.5839 | 0.0515            | PAW <sup>89</sup>   |
| Ta <sub>3</sub> AlC <sub>2</sub>           | 417             | 118             | 187             | 351             | 177             | 150             | 147  | 241   | 0.2466 | 0.6099 | -0.0456           | PAW <sup>89</sup>   |
| Cr <sub>3</sub> AlC <sub>2</sub>           | 381             | 100             | 136             | 381             | 118             | 141             | 117  | 209   | 0.2649 | 0.5582 | 0.0258            | PAW <sup>89</sup>   |
| Mo <sub>3</sub> AlC <sub>2</sub>           | 370             | 159             | 140             | 361             | 121             | 105             | 113  | 220   | 0.2800 | 0.5155 | 0.1661            | PAW <sup>89</sup>   |
| W <sub>3</sub> AlC <sub>2</sub>            | 392             | 181             | 177             | 389             | 121             | 106             | 112  | 249   | 0.3047 | 0.4490 | 0.2628            | PAW <sup>89</sup>   |
| Ti <sub>3</sub> SiC <sub>2</sub>           | 366             | 94              | 100             | 352             | 153             | 136             | 141  | 186   | 0.1976 | 0.7574 | -0.2557           | GGA <sup>90</sup>   |
| Ti <sub>3</sub> GeC <sub>2</sub>           | 357             | 94              | 97              | 333             | 143             | 132             | 133  | 182   | 0.2048 | 0.7350 | -0.2230           | GGA <sup>90</sup>   |
| Ti <sub>3</sub> SnC <sub>2</sub>           | 346             | 92              | 84              | 313             | 123             | 127             | 124  | 169   | 0.2051 | 0.7341 | -0.2187           | GGA <sup>90</sup>   |
| Ti <sub>2</sub> GeC                        | 279             | 99              | 95              | 283             | 125             | 90              | 104  | 158   | 0.2306 | 0.6569 | -0.0666           | LDA <sup>91</sup>   |

TABLE X: The elastic properties (in GPa) of potential structural materials for nuclear reactors, as well as experimental results(continued).

|                     | C <sub>11</sub> | C <sub>12</sub> | C <sub>13</sub> | C <sub>33</sub> | C <sub>44</sub> | C <sub>66</sub> | G     | B     | $\nu$  | G/B    | Cauchy Pressure/B | Note               |
|---------------------|-----------------|-----------------|-----------------|-----------------|-----------------|-----------------|-------|-------|--------|--------|-------------------|--------------------|
| V <sub>2</sub> GeC  | 282             | 121             | 144             | 259             | 160             | 80.5            | 108   | 182   | 0.2532 | 0.5908 | 0.0672            | LDA <sup>91</sup>  |
| Cr <sub>2</sub> GeC | 315             | 148             | 146             | 354             | 89              | 83.5            | 88    | 207   | 0.3130 | 0.4273 | 0.2937            | LDA <sup>91</sup>  |
| Zr <sub>2</sub> GeC | 224             | 105             | 108             | 243             | 99              | 59.5            | 74    | 148   | 0.2856 | 0.5004 | 0.1842            | LDA <sup>91</sup>  |
| Nb <sub>2</sub> GeC | 308             | 133             | 168             | 306             | 177             | 87.5            | 119   | 206   | 0.2590 | 0.5744 | 0.0884            | LDA <sup>91</sup>  |
| Mo <sub>2</sub> GeC | 331             | 136             | 184             | 342             | 123             | 97.5            | 100   | 223   | 0.3052 | 0.4478 | 0.2235            | LDA <sup>91</sup>  |
| Hf <sub>2</sub> GeC | 269             | 96              | 125             | 278             | 128             | 86.5            | 97    | 167   | 0.2568 | 0.5804 | 0.0194            | LDA <sup>91</sup>  |
| Ta <sub>2</sub> GeC | 370             | 147             | 194             | 389             | 220             | 111.5           | 149.9 | 243.4 | 0.2445 | 0.6161 | 0.0195            | LDA <sup>91</sup>  |
| W <sub>2</sub> GeC  | 340             | 146             | 222             | 368             | 117             | 97.0            | 96.7  | 244   | 0.3963 | 0.3250 | 0.3156            | LDA <sup>91</sup>  |
| Ti <sub>2</sub> GaC | 314             | 66              | 59              | 272             | 122             | 124             | 121   | 141   | 0.1650 | 0.8627 | -0.4306           | LDA <sup>92</sup>  |
| Nb <sub>2</sub> GaC | 374             | 88              | 135             | 310             | 149             | 141.5           | 132   | 197   | 0.2260 | 0.6704 | -0.1713           | LDA <sup>92</sup>  |
| Ta <sub>2</sub> GaC | 420             | 101             | 146             | 333             | 175             | 159.5           | 150   | 217   | 0.2186 | 0.6929 | -0.2013           | LDA <sup>92</sup>  |
| V <sub>2</sub> GaC  | 343             | 67              | 124             | 312             | 157             | 138             | 133   | 181   | 0.2044 | 0.7362 | -0.2877           | LDA <sup>92</sup>  |
| V                   | 232.4           | 119.36          | -               | -               | 45.95           | -               | 50    | 157   | 0.3563 | 0.3179 | 0.4675            | 4.2K <sup>93</sup> |
| V                   | 227.95          | 118.75          | -               | -               | 42.55           | -               | 47    | 155   | 0.3624 | 0.3031 | 0.4911            | 300K <sup>93</sup> |
| Ta                  | 267.95          | 162.4           | -               | -               | 86.75           | -               | 71    | 198   | 0.3394 | 0.3597 | 0.3829            | 4.2K <sup>94</sup> |
| Ta                  | 266.86          | 162.17          | -               | -               | 85.49           | -               | 70    | 197   | 0.3407 | 0.3563 | 0.3891            | 100K <sup>94</sup> |
| Ta                  | 264.82          | 161.29          | -               | -               | 83.32           | -               | 69    | 195.8 | 0.3426 | 0.3516 | 0.3982            | 200K <sup>94</sup> |
| Ta                  | 262.77          | 160.88          | -               | -               | 81.44           | -               | 67    | 194.8 | 0.3448 | 0.3463 | 0.4077            | 300K <sup>94</sup> |
| Ta90W10             | 287.98          | 162.11          | -               | -               | 87.21           | -               | 76.5  | 204   | 0.3333 | 0.3750 | 0.3670            | 4.2K <sup>94</sup> |
| Ta90W10             | 286.78          | 161.98          | -               | -               | 86.28           | -               | 75.8  | 203.6 | 0.3344 | 0.3722 | 0.3718            | 100K <sup>94</sup> |
| Ta90W10             | 284.73          | 161.73          | -               | -               | 84.68           | -               | 74.5  | 202.7 | 0.3363 | 0.3675 | 0.3801            | 200K <sup>94</sup> |
| Ta90W10             | 282.51          | 161.24          | -               | -               | 83.15           | -               | 73.3  | 201.7 | 0.3380 | 0.3633 | 0.3872            | 300K <sup>94</sup> |
| Ta70W30             | 325.95          | 173.26          | -               | -               | 87.31           | -               | 82.7  | 224.1 | 0.3357 | 0.3691 | 0.3834            | 4.2K <sup>94</sup> |
| Ta70W30             | 325.10          | 172.67          | -               | -               | 86.93           | -               | 82.5  | 223.5 | 0.3357 | 0.3690 | 0.3837            | 100K <sup>94</sup> |
| Ta70W30             | 323.12          | 171.60          | -               | -               | 86.23           | -               | 81.9  | 222.1 | 0.3359 | 0.3686 | 0.3844            | 200K <sup>94</sup> |
| Ta70W30             | 321.13          | 170.42          | -               | -               | 85.56           | -               | 81.3  | 222.6 | 0.3359 | 0.3685 | 0.3846            | 300K <sup>94</sup> |
| Ta50W50             | 371.14          | 185.65          | -               | -               | 86.72           | -               | 89.1  | 247.5 | 0.3393 | 0.3599 | 0.3997            | 4.2K <sup>94</sup> |
| Ta50W50             | 370.38          | 185.19          | -               | -               | 87.07           | -               | 89.2  | 246.9 | 0.3387 | 0.3614 | 0.3974            | 100K <sup>94</sup> |
| Ta50W50             | 368.59          | 183.85          | -               | -               | 87.49           | -               | 89.4  | 245.4 | 0.3376 | 0.3643 | 0.3926            | 200K <sup>94</sup> |
| Ta50W50             | 366.51          | 182.23          | -               | -               | 88.03           | -               | 89.7  | 243.7 | 0.3361 | 0.3679 | 0.3866            | 300K <sup>94</sup> |
| Ta33W67             | 434.65          | 191.29          | -               | -               | 114.43          | -               | 117.3 | 272.4 | 0.3118 | 0.4305 | 0.2821            | 4.2K <sup>94</sup> |
| Ta33W67             | 433.50          | 191.13          | -               | -               | 114.30          | -               | 117.0 | 271.9 | 0.3118 | 0.4303 | 0.2825            | 100K <sup>94</sup> |
| Ta33W67             | 430.52          | 190.88          | -               | -               | 114.05          | -               | 116.3 | 270.8 | 0.3121 | 0.4296 | 0.2838            | 200K <sup>94</sup> |
| Ta33W67             | 426.86          | 189.97          | -               | -               | 113.84          | -               | 115.7 | 268.9 | 0.3119 | 0.4300 | 0.2831            | 300K <sup>94</sup> |
| Ta17W83             | 481.68          | 196.41          | -               | -               | 139.32          | -               | 140.6 | 291.5 | 0.2922 | 0.4825 | 0.1958            | 4.2K <sup>94</sup> |
| Ta17W83             | 480.49          | 196.21          | -               | -               | 139.07          | -               | 140.3 | 290.9 | 0.2923 | 0.4821 | 0.1964            | 100K <sup>94</sup> |
| Ta17W83             | 476.94          | 196.42          | -               | -               | 138.34          | -               | 139.1 | 289.9 | 0.2932 | 0.4798 | 0.2003            | 200K <sup>94</sup> |
| Ta17W83             | 473.12          | 196.72          | -               | -               | 137.68          | -               | 137.9 | 288.9 | 0.2941 | 0.4774 | 0.2044            | 300K <sup>94</sup> |
| W                   | 530.25          | 201.90          | -               | -               | 160.92          | -               | 162.2 | 311.4 | 0.2780 | 0.5210 | 0.1316            | 4.2K <sup>94</sup> |
| W                   | 529.81          | 199.98          | -               | -               | 160.83          | -               | 162.5 | 309.9 | 0.2769 | 0.5242 | 0.1263            | 100K <sup>94</sup> |
| W                   | 526.42          | 200.75          | -               | -               | 159.58          | -               | 160.9 | 309.3 | 0.2784 | 0.5201 | 0.1331            | 200K <sup>94</sup> |
| W                   | 521.48          | 201.01          | -               | -               | 158.50          | -               | 159.2 | 307.8 | 0.2795 | 0.5171 | 0.1381            | 300K <sup>94</sup> |
| V                   | 237             | 122             | -               | -               | 47.08           | -               | 82.7  | 224.1 | 0.3357 | 0.3691 | 0.3834            | 4.2K <sup>95</sup> |
| V                   | 236.09          | 121.09          | -               | -               | 46.145          | -               | 50.4  | 159.4 | 0.3570 | 0.3161 | 0.4701            | 100K <sup>95</sup> |
| V                   | 233.38          | 120.72          | -               | -               | 44.800          | -               | 49.1  | 158.3 | 0.3594 | 0.3102 | 0.4797            | 200K <sup>95</sup> |
| V                   | 230.98          | 120.17          | -               | -               | 43.768          | -               | 48    | 157   | 0.3611 | 0.3062 | 0.4863            | 300K <sup>95</sup> |
| V                   | 281.72          | 124.63          | -               | -               | 36.09           | -               | 49.6  | 177.0 | 0.3716 | 0.2800 | 0.5002            | EMTO <sup>96</sup> |
| V-2.5Cr             | 285.81          | 125.15          | -               | -               | 35.38           | -               | 49.5  | 178.7 | 0.3733 | 0.2768 | 0.5023            | EMTO <sup>96</sup> |
| V-5Cr               | 289.59          | 125.48          | -               | -               | 34.37           | -               | 49.1  | 180.2 | 0.3751 | 0.2726 | 0.5057            | EMTO <sup>96</sup> |
| V-7.5Cr             | 292.85          | 125.84          | -               | -               | 33.20           | -               | 48.5  | 181.5 | 0.3773 | 0.2674 | 0.5104            | EMTO <sup>96</sup> |
| V10Cr               | 296.66          | 125.79          | -               | -               | 32.15           | -               | 48.2  | 182.7 | 0.3789 | 0.2635 | 0.5124            | EMTO <sup>96</sup> |
| V-2.5Ti             | 275.2           | 123.49          | -               | -               | 36.60           | -               | 49.2  | 174.1 | 0.3708 | 0.2828 | 0.4992            | EMTO <sup>96</sup> |
| V-5Ti               | 269.21          | 122.40          | -               | -               | 37.03           | -               | 48.9  | 171.3 | 0.3697 | 0.2853 | 0.4983            | EMTO <sup>96</sup> |
| V-7.5Ti             | 263.45          | 121.55          | -               | -               | 37.72           | -               | 48.7  | 168.9 | 0.3684 | 0.2885 | 0.4965            | EMTO <sup>96</sup> |
| V-10Ti              | 257.71          | 120.55          | -               | -               | 38.32           | -               | 48.5  | 166.3 | 0.3671 | 0.2916 | 0.4946            | EMTO <sup>96</sup> |
| V-2.5Cr-2.5Ti       | 279.76          | 123.82          | -               | -               | 36.11           | -               | 49.4  | 175.8 | 0.3715 | 0.2811 | 0.4989            | EMTO <sup>96</sup> |
| V-2.5Cr-5Ti         | 273.49          | 122.72          | -               | -               | 36.76           | -               | 49.2  | 173.0 | 0.3700 | 0.2846 | 0.4969            | EMTO <sup>96</sup> |
| V-2.5Cr-7.5Ti       | 267.53          | 121.67          | -               | -               | 37.27           | -               | 48.9  | 170.3 | 0.3689 | 0.2874 | 0.4956            | EMTO <sup>96</sup> |
| V-2.5Cr-10Ti        | 261.76          | 120.70          | -               | -               | 37.94           | -               | 48.8  | 167.7 | 0.3675 | 0.2907 | 0.4934            | EMTO <sup>96</sup> |
| V-4Cr-4Ti           | 278.56          | 123.34          | -               | -               | 36.16           | -               | 49.4  | 175.1 | 0.3711 | 0.2819 | 0.4979            | EMTO <sup>96</sup> |
| V-5Cr-2.5Ti         | 283.72          | 124.23          | -               | -               | 35.47           | -               | 49.4  | 177.4 | 0.3726 | 0.2784 | 0.5004            | EMTO <sup>96</sup> |
| V-5Cr-5Ti           | 277.78          | 123.02          | -               | -               | 36.24           | -               | 49.4  | 174.6 | 0.3708 | 0.2827 | 0.4970            | EMTO <sup>96</sup> |
| V-5Cr-7.5Ti         | 271.64          | 121.97          | -               | -               | 36.85           | -               | 49.1  | 171.9 | 0.3695 | 0.2859 | 0.4953            | EMTO <sup>96</sup> |
| V-5Cr-10Ti          | 265.81          | 120.92          | -               | -               | 37.53           | -               | 48.9  | 169.2 | 0.3680 | 0.2895 | 0.4928            | EMTO <sup>96</sup> |
| V-7.5Cr-2.5Ti       | 287.22          | 124.30          | -               | -               | 34.62           | -               | 49.2  | 178.6 | 0.3739 | 0.2752 | 0.5021            | EMTO <sup>96</sup> |
| V-7.5Cr-5Ti         | 282.71          | 122.87          | -               | -               | 35.68           | -               | 49.6  | 176.2 | 0.3713 | 0.2816 | 0.4950            | EMTO <sup>96</sup> |
| V-7.5Cr-7.5Ti       | 275.88          | 122.25          | -               | -               | 36.51           | -               | 49.4  | 173.5 | 0.3699 | 0.2849 | 0.4943            | EMTO <sup>96</sup> |
| V-7.5Cr-10Ti        | 269.97          | 121.12          | -               | -               | 37.17           | -               | 49.3  | 170.7 | 0.3684 | 0.2886 | 0.4917            | EMTO <sup>96</sup> |
| V-10Cr-2.5Ti        | 291.44          | 124.77          | -               | -               | 33.76           | -               | 53.9  | 179.4 | 0.3635 | 0.3004 | 0.5037            | EMTO <sup>96</sup> |
| V-10Cr-5Ti          | 285.66          | 123.62          | -               | -               | 35.03           | -               | 53.4  | 177.6 | 0.3633 | 0.3008 | 0.4987            | EMTO <sup>96</sup> |

TABLE XI: The elastic properties (in GPa) of potential structural materials for nuclear reactors, as well as experimental results(continued).

|              | C <sub>11</sub> | C <sub>12</sub> | C <sub>13</sub> | C <sub>33</sub> | C <sub>44</sub> | C <sub>66</sub> | G     | B     | $\nu$  | G/B    | Cauchy Pressure/B | Note                |
|--------------|-----------------|-----------------|-----------------|-----------------|-----------------|-----------------|-------|-------|--------|--------|-------------------|---------------------|
| V-10Cr-7.5Ti | 280.81          | 122.13          | -               | -               | 36.05           | -               | 50    | 175   | 0.3702 | 0.2842 | 0.4918            | EMTO <sup>96</sup>  |
| V-10Cr-10Ti  | 274.07          | 121.35          | -               | -               | 36.90           | -               | 50    | 172   | 0.3686 | 0.2879 | 0.4903            | EMTO <sup>96</sup>  |
| Nb           | 244.1           | 130             | -               | -               | 27.8            | -               | 37.2  | 168.0 | 0.3968 | 0.2216 | 0.6082            | 300K <sup>97</sup>  |
| Nb90Zr10     | 229.2           | 124.8           | -               | -               | 27.0            | -               | 35.3  | 159.6 | 0.3971 | 0.2210 | 0.6128            | 300K <sup>97</sup>  |
| Nb80Zr20     | 203             | 114             | -               | -               | 27.1            | -               | 33.0  | 143.6 | 0.3930 | 0.2303 | 0.6049            | 300K <sup>97</sup>  |
| Nb70Zr30     | 180.8           | 106.4           | -               | -               | 28.6            | -               | 31.7  | 131.2 | 0.3879 | 0.2422 | 0.5930            | 300K <sup>97</sup>  |
| Nb60Zr40     | 164.9           | 100.0           | -               | -               | 30.0            | -               | 31.0  | 121.6 | 0.3827 | 0.2545 | 0.5755            | 300K <sup>97</sup>  |
| Nb50Zr50     | 151.8           | 96.6            | -               | -               | 31.8            | -               | 30.0  | 115.0 | 0.3798 | 0.2613 | 0.5635            | 300K <sup>97</sup>  |
| Nb30Zr70     | 124.4           | 88.2            | -               | -               | 33.6            | -               | 26.2  | 100.3 | 0.3798 | 0.2614 | 0.5445            | 300K <sup>97</sup>  |
| Nb           | 220.1           | 124.4           | -               | -               | 34.7            | -               | 39.5  | 156.3 | 0.3835 | 0.2525 | 0.5739            | 1500K <sup>97</sup> |
| Nb90Zr10     | 204.2           | 119.2           | -               | -               | 34.6            | -               | 37.6  | 147.5 | 0.3826 | 0.2547 | 0.5734            | 1500K <sup>97</sup> |
| Nb80Zr20     | 177.4           | 108.1           | -               | -               | 33.4            | -               | 33.9  | 131.2 | 0.3811 | 0.2583 | 0.5694            | 1500K <sup>97</sup> |
| Nb70Zr30     | 156.9           | 101.5           | -               | -               | 33.1            | -               | 30.8  | 119.9 | 0.3817 | 0.2569 | 0.5702            | 1500K <sup>97</sup> |
| Nb60Zr40     | 144.9           | 96.4            | -               | -               | 31.4            | -               | 28.3  | 112.6 | 0.3840 | 0.2515 | 0.5774            | 1500K <sup>97</sup> |
| Nb50Zr50     | 131.3           | 92.6            | -               | -               | 30.5            | -               | 25.5  | 105.4 | 0.3885 | 0.2409 | 0.5886            | 1500K <sup>97</sup> |
| Nb30Zr70     | 111.9           | 84.0            | -               | -               | 28.7            | -               | 21.5  | 93.3  | 0.3931 | 0.2303 | 0.5927            | 1500K <sup>97</sup> |
| Nb50Zr50     | 155.6           | 96.9            | -               | -               | 33.2            | -               | 31.6  | 116.5 | 0.3756 | 0.2713 | 0.5469            | 5K <sup>97</sup>    |
| Nb50Zr50     | 149             | 95.9            | -               | -               | 31.9            | -               | 29.6  | 113.6 | 0.3799 | 0.2609 | 0.5634            | 500K <sup>97</sup>  |
| Nb50Zr50     | 141.2           | 94.5            | -               | -               | 31.4            | -               | 27.9  | 110.1 | 0.3832 | 0.2534 | 0.5733            | 1000K <sup>97</sup> |
| Nb50Zr50     | 132             | 92.5            | -               | -               | 30.7            | -               | 25.7  | 105.7 | 0.3874 | 0.2434 | 0.5849            | 1500K <sup>97</sup> |
| Cr-0.67%V    | 379.6           | 78.2            | -               | -               | 102.73          | -               | 119.8 | 178.7 | 0.2259 | 0.6706 | -0.1373           | 80K <sup>98</sup>   |
| Cr-0.67%V    | 378.8           | 78.1            | -               | -               | 102.64          | -               | 119.6 | 178.3 | 0.2259 | 0.6709 | -0.1376           | 100K <sup>98</sup>  |
| Cr-0.67%V    | 375.3           | 77.5            | -               | -               | 102.23          | -               | 118.9 | 176.8 | 0.2253 | 0.6726 | -0.1399           | 150K <sup>98</sup>  |
| Cr-0.67%V    | 370.3           | 76.1            | -               | -               | 101.76          | -               | 118.0 | 174.2 | 0.2237 | 0.6774 | -0.1473           | 200K <sup>98</sup>  |
| Cr-0.67%V    | 366.1           | 74.3            | -               | -               | 101.41          | -               | 117.4 | 171.6 | 0.2215 | 0.6840 | -0.1580           | 230K <sup>98</sup>  |
| Cr-0.67%V    | 363.9           | 72.9            | -               | -               | 101.30          | -               | 117.1 | 169.9 | 0.2197 | 0.6895 | -0.1672           | 240K <sup>98</sup>  |
| Cr-0.67%V    | 362.8           | 71.9            | -               | -               | 101.27          | -               | 117.1 | 168.9 | 0.2184 | 0.6935 | -0.1739           | 245K <sup>98</sup>  |
| Cr-0.67%V    | 369.0           | 78.5            | -               | -               | 101.22          | -               | 117.0 | 175.3 | 0.2270 | 0.6674 | -0.1296           | 250K <sup>98</sup>  |
| Cr-0.67%V    | 372.8           | 82.9            | -               | -               | 101.12          | -               | 116.8 | 179.5 | 0.2326 | 0.6508 | -0.1015           | 260K <sup>98</sup>  |
| Cr-0.67%V    | 373.2           | 85.9            | -               | -               | 100.72          | -               | 116.1 | 181.7 | 0.2365 | 0.6393 | -0.0816           | 300K <sup>98</sup>  |
| Cr-0.67%V    | 371.8           | 88.0            | -               | -               | 100.23          | -               | 115.2 | 182.6 | 0.2393 | 0.6313 | -0.0670           | 350K <sup>98</sup>  |
| Cr-1.5%V     | 383.4           | 102.2           | -               | -               | 102.10          | -               | 116.1 | 195.9 | 0.2526 | 0.5924 | 0.0005            | 80K <sup>98</sup>   |
| Cr-1.5%V     | 382.4           | 102.1           | -               | -               | 101.97          | -               | 115.8 | 195.5 | 0.2526 | 0.5924 | 0.0007            | 100K <sup>98</sup>  |
| Cr-1.5%V     | 380.1           | 101.6           | -               | -               | 101.59          | -               | 115.3 | 194.4 | 0.2525 | 0.5929 | 0.0001            | 130K <sup>98</sup>  |
| Cr-1.5%V     | 378.5           | 101.5           | -               | -               | 101.33          | -               | 114.9 | 193.8 | 0.2526 | 0.5926 | 0.0009            | 150K <sup>98</sup>  |
| Cr-1.5%V     | 377.7           | 101.6           | -               | -               | 101.20          | -               | 114.6 | 193.6 | 0.2528 | 0.5919 | 0.0021            | 160K <sup>98</sup>  |
| Cr-1.5%V     | 377.3           | 101.4           | -               | -               | 101.13          | -               | 114.5 | 193.4 | 0.2527 | 0.5923 | 0.0014            | 165K <sup>98</sup>  |
| Cr-1.5%V     | 380.7           | 104.8           | -               | -               | 110.17          | -               | 120.6 | 196.8 | 0.2456 | 0.6127 | -0.0273           | 170K <sup>98</sup>  |
| Cr-1.5%V     | 382.1           | 106.4           | -               | -               | 101.02          | -               | 114.4 | 198.3 | 0.2580 | 0.5771 | 0.0271            | 175K <sup>98</sup>  |
| Cr-1.5%V     | 382.0           | 106.6           | -               | -               | 101.00          | -               | 114.4 | 198.4 | 0.2582 | 0.5764 | 0.0282            | 180K <sup>98</sup>  |
| Cr-1.5%V     | 381.9           | 107.1           | -               | -               | 100.91          | -               | 114.2 | 198.7 | 0.2588 | 0.5748 | 0.0312            | 190K <sup>98</sup>  |
| Cr-1.5%V     | 381.5           | 107.2           | -               | -               | 100.83          | -               | 114.1 | 198.6 | 0.2590 | 0.5743 | 0.0321            | 200K <sup>98</sup>  |
| Cr-1.5%V     | 379.5           | 108.2           | -               | -               | 100.36          | -               | 113.2 | 198.6 | 0.2605 | 0.5701 | 0.0395            | 250K <sup>98</sup>  |
| Cr-1.5%V     | 376.4           | 107.9           | -               | -               | 99.88           | -               | 112.5 | 197.4 | 0.2606 | 0.5697 | 0.0406            | 300K <sup>98</sup>  |
| Cr-1.5%V     | 373.4           | 108.2           | -               | -               | 99.42           | -               | 111.6 | 196.6 | 0.2614 | 0.5676 | 0.0447            | 350K <sup>98</sup>  |
| Cr           | 394.1           | 88.5            | -               | -               | 103.75          | -               | 121.2 | 190.4 | 0.2374 | 0.6367 | -0.0801           | 0K <sup>9</sup>     |
| Cr           | 393.2           | 88.2            | -               | -               | 103.73          | -               | 121.1 | 189.9 | 0.2370 | 0.6378 | -0.0818           | 50K <sup>9</sup>    |
| Cr           | 389.8           | 87.4            | -               | -               | 103.28          | -               | 120.4 | 188.2 | 0.2364 | 0.6395 | -0.0844           | 100K <sup>9</sup>   |
| Cr           | 389.4           | 87.4            | -               | -               | 103.04          | -               | 120.1 | 188.1 | 0.2367 | 0.6388 | -0.0832           | 110K <sup>9</sup>   |
| Cr           | 388.0           | 87.2            | -               | -               | 102.35          | -               | 119.5 | 187.5 | 0.2372 | 0.6372 | -0.0808           | 120K <sup>9</sup>   |
| Cr           | 386.5           | 95.3            | -               | -               | 101.33          | -               | 117.2 | 192.4 | 0.2468 | 0.6092 | -0.0313           | 125K <sup>9</sup>   |
| Cr           | 380.4           | 91.0            | -               | -               | 101.93          | -               | 117.3 | 187.5 | 0.2411 | 0.6258 | -0.0583           | 130K <sup>9</sup>   |
| Cr           | 380.3           | 92.7            | -               | -               | 102.28          | -               | 117.3 | 188.6 | 0.2425 | 0.6219 | -0.0508           | 135K <sup>9</sup>   |
| Cr           | 378.7           | 92.9            | -               | -               | 102.35          | -               | 117.0 | 188.2 | 0.2425 | 0.6219 | -0.0502           | 140K <sup>9</sup>   |
| Cr           | 378.5           | 94.5            | -               | -               | 102.38          | -               | 116.7 | 189.2 | 0.2441 | 0.6171 | -0.0417           | 145K <sup>9</sup>   |
| Cr           | 374.7           | 99.9            | -               | -               | 101.99          | -               | 114.9 | 191.5 | 0.2499 | 0.6002 | -0.0109           | 185K <sup>9</sup>   |
| Cr           | 372.9           | 99.3            | -               | -               | 101.80          | -               | 114.6 | 190.5 | 0.2494 | 0.6016 | -0.0131           | 200K <sup>9</sup>   |
| Cr           | 364.7           | 90.9            | -               | -               | 101.15          | -               | 114.2 | 182.2 | 0.2407 | 0.6269 | -0.0563           | 250K <sup>9</sup>   |
| Cr           | 348.4           | 70.2            | -               | -               | 100.71          | -               | 114.6 | 162.9 | 0.2150 | 0.7036 | -0.1873           | 300K <sup>9</sup>   |
| Cr           | 345.1           | 66.3            | -               | -               | 100.67          | -               | 114.7 | 159.2 | 0.2096 | 0.7204 | -0.2158           | 305K <sup>9</sup>   |
| Cr           | 337.2           | 57.4            | -               | -               | 100.70          | -               | 114.9 | 150.7 | 0.1960 | 0.7626 | -0.2874           | 310K <sup>9</sup>   |
| Cr           | 354.2           | 72.4            | -               | -               | 100.67          | -               | 115.2 | 166.3 | 0.2186 | 0.6926 | -0.1699           | 315K <sup>9</sup>   |
| Cr           | 356.4           | 75.0            | -               | -               | 100.64          | -               | 115.1 | 168.8 | 0.2222 | 0.6820 | -0.1519           | 320K <sup>9</sup>   |
| Cr           | 358.4           | 77.4            | -               | -               | 100.53          | -               | 114.9 | 171.1 | 0.2254 | 0.6721 | -0.1352           | 330K <sup>9</sup>   |

TABLE XII: The calculated Eigenvalue of Hessian matrix at critical points and  $\Delta\rho$ .

|                | CP class | Eigenvalue1 | Eigenvalue2 | Eigenvalue3 | $\Delta\rho$ | charge density |
|----------------|----------|-------------|-------------|-------------|--------------|----------------|
| Diamond-C      | Bond     | -4.731E-1   | -4.731E-1   | 3.796E-1    | -5.667E-1    | 2.404E-1       |
| Diamond-C      | Ring     | -1.694E-2   | 6.183E-2    | 6.244E-2    | 1.073E-1     | 2.123E-2       |
| Diamond-C      | Cage     | 2.500E-2    | 2.500E-2    | 2.500E-2    | 7.499E-2     | 1.312E-2       |
| Diamond-Si     | Bond     | -7.280E-2   | -7.280E-2   | 2.156E-2    | -1.240E-1    | 8.340E-2       |
| Diamond-Si     | Ring     | -2.078E-3   | 7.253E-3    | 7.314E-3    | 1.249E-2     | 5.366E-3       |
| Diamond-Si     | Cage     | 2.742E-3    | 2.742E-3    | 2.742E-3    | 8.226E-3     | 3.115E-3       |
| Diamond-Si-HSE | Bond     | -7.747E-2   | -7.747E-2   | 1.714E-2    | -1.378E-1    | 8.6857E-2      |
| Diamond-Si-HSE | Ring     | -2.196E-3   | 7.674E-3    | 7.674E-3    | 1.315E-2     | 5.575E-3       |
| Diamond-Si-HSE | Cage     | 2.896E-3    | 2.896E-3    | 2.896E-3    | 8.6868E-3    | 3.1847E-3      |
| fcc-Ti         | Nuclei   | -1.360E-03  | -1.360E-03  | -1.360E-03  | -4.080E-03   | 2.972E-02      |
| fcc-Ti         | Bond     | -2.493E-03  | -2.493E-03  | 1.750E-03   | -3.092E-03   | 2.971E-02      |
| fcc-Ti         | Ring     | -5.504E-03  | 3.656E-03   | 3.243E-02   | 3.058E-02    | 2.797E-02      |
| fcc-Ti         | Cage     | 4.806E-04   | 4.806E-04   | 4.806E-04   | 1.442E-03    | 2.459E-02      |
| fcc-Zr         | Nuclei   | -4.237E-04  | -4.237E-04  | -4.237E-04  | -1.271E-03   | 2.640E-02      |
| fcc-Zr         | Bond     | -8.591E-04  | -8.591E-04  | 6.080E-04   | -1.110E-03   | 2.640E-02      |
| fcc-Zr         | Ring     | -5.331E-03  | 2.253E-03   | 2.830E-02   | 2.523E-02    | 2.533E-02      |
| fcc-Zr         | Cage     | 1.066E-03   | 1.066E-03   | 1.066E-03   | 2.039E-02    | 3.199E-03      |
| fcc-Al         | Bond     | -1.045E-2   | -2.570E-03  | 1.313E-02   | 1.147E-4     | 3.007E-2       |
| fcc-Al         | Ring     | -2.602E-03  | 4.778E-03   | 4.778E-03   | 6.954E-03    | 2.817E-2       |
| fcc-Al         | O-site   | 7.652E-03   | 7.652E-03   | 7.652E-03   | 2.296E-02    | 1.690E-2       |
| fcc-Al         | T-site   | 2.511E-03   | 2.511E-03   | 2.511E-03   | 7.532E-03    | 2.808E-2       |
| fcc-Cu         | Bond     | -2.077E-02  | -1.516E-02  | 1.002E-01   | 6.423E-02    | 3.824E-02      |
| fcc-Cu         | Ring     | -9.679E-03  | 2.190E-02   | 2.190E-02   | 3.411E-02    | 3.142E-02      |
| fcc-Cu         | O-site   | 9.909E-03   | 9.909E-03   | 9.909E-03   | 2.973E-02    | 2.089E-02      |
| fcc-Cu         | T-site   | 1.095E-02   | 1.095E-02   | 1.095E-02   | 3.285E-02    | 3.044E-02      |
| fcc-Au         | Bond     | -2.014E-02  | -1.991E-02  | 1.148E-01   | 7.472E-02    | 3.708E-02      |
| fcc-Au         | Ring     | -1.059E-02  | 2.766E-02   | 2.939E-02   | 4.646E-02    | 2.578E-02      |
| fcc-Au         | O-site   | 8.820E-03   | 8.820E-03   | 8.820E-03   | 2.646E-02    | 1.310E-02      |
| fcc-Au         | T-site   | 1.488E-02   | 1.488E-02   | 1.488E-02   | 4.463E-02    | 2.371E-02      |
| bcc-Mo         | Bond     | -0.0225     | -0.0223     | 0.0796      | 0.035        | 0.050          |
| bcc-Mo         | Ring     | -0.0044     | 0.0095      | 0.0095      | 0.015        | 0.037          |
| bcc-Mo         | Cage     | 0.0048      | 0.0048      | 0.0057      | 0.015        | 0.035          |
| bcc-Nb         | Bond     | -0.0158     | -0.0158     | 0.0900      | 0.0584       | 0.0414         |
| bcc-Nb         | Ring     | -0.0016     | 0.0082      | 0.0082      | 0.0148       | 0.0307         |
| bcc-Nb         | Cage     | 0.0029      | 0.0029      | 0.0134      | 0.0191       | 0.0296         |
| hcp-Ti         | Nuclei   | -0.0016     | 0.0082      | 0.0082      | -0.0065      | 0.0335         |
| hcp-Ti         | Bond1    | 0.0029      | 0.0029      | 0.0134      | -8.074E-5    | 0.0311         |
| hcp-Ti         | Bond2    | 0.0029      | 0.0029      | 0.0134      | -0.0062      | 0.0335         |
| NaCl           | Bond1    | -2.291E-3   | -1.158E-3   | 1.537E-2    | 1.192E-2     | 4.630E-3       |
| NaCl           | Bond2    | -1.098E-2   | -1.097E-2   | 7.881E-2    | 5.686E-2     | 1.180E-2       |
| NaCl           | Ring     | -2.207E-3   | 4.412E-3    | 1.103E-2    | 1.324E-2     | 4.270E-3       |
| NaCl           | Cage     | 1.520E-3    | 1.520E-3    | 1.520E-3    | 4.561E-3     | 1.877E-3       |
| KCl            | Bond     | -8.756E-03  | -8.755E-03  | 5.886E-02   | 4.135E-02    | 1.139E-02      |
| KCl            | Ring     | -9.270E-04  | 2.892E-04   | 6.398E-03   | 5.760E-03    | 2.146E-03      |
| KCl            | Cage     | 6.080E-04   | 6.080E-04   | 6.080E-04   | 1.824E-03    | 7.640E-04      |
| Graphene       | Bond     | -2.821E-04  | -2.810E-04  | 4.757E-03   | 4.194E-03    | 1.307E-03      |
| Diamond-C      | Bond     | -4.731E-1   | -4.731E-1   | 3.796E-1    | -5.667E-1    | 2.404E-1       |
| Diamond-Si     | Bond     | -7.280E-2   | -7.280E-2   | 2.156E-2    | -1.240E-1    | 8.340E-2       |
| Diamond-Si-HSE | Bond     | -7.747E-2   | -7.747E-2   | 1.714E-2    | -1.378E-1    | 8.6857E-2      |
| fcc-Ti         | Bond     | -2.493E-03  | -2.493E-03  | 1.750E-03   | -3.092E-03   | 2.971E-02      |
| fcc-Zr         | Bond     | -8.591E-04  | -8.591E-04  | 6.080E-04   | -1.110E-03   | 2.640E-02      |
| fcc-Al         | Bond     | -1.045E-2   | -2.570E-03  | 1.313E-02   | 1.147E-4     | 3.007E-2       |
| fcc-Cu         | Bond     | -2.077E-02  | -1.516E-02  | 1.002E-01   | 6.423E-02    | 3.824E-02      |
| fcc-Au         | Bond     | -2.014E-02  | -1.991E-02  | 1.148E-01   | 7.472E-02    | 3.708E-02      |
| bcc-Mo         | Bond     | -0.0225     | -0.0223     | 0.0796      | 0.035        | 0.050          |
| bcc-Nb         | Bond     | -0.0158     | -0.0158     | 0.0900      | 0.0584       | 0.0414         |
| hcp-Ti         | Bond1    | 0.0029      | 0.0029      | 0.0134      | -8.074E-5    | 0.0311         |
| hcp-Ti         | Bond2    | 0.0029      | 0.0029      | 0.0134      | -0.0062      | 0.0335         |
| NaCl           | Bond1    | -2.291E-3   | -1.158E-3   | 1.537E-2    | 1.192E-2     | 4.630E-3       |
| NaCl           | Bond2    | -1.098E-2   | -1.097E-2   | 7.881E-2    | 5.686E-2     | 1.180E-2       |
| KCl            | Bond     | -8.756E-03  | -8.755E-03  | 5.886E-02   | 4.135E-02    | 1.139E-02      |

TABLE XIII: The charge density (in electrons per Bohr<sup>3</sup>), laplacian of charge density (in electrons per Bohr<sup>5</sup>) at bonding critical points, shear modulus (in GPa), bulk modulus (in GPa), G/B and Poisson's ratio for fcc and bcc metals.

|            | $\rho_b$  | $\Delta\rho$ | $\theta$ | $\langle \tan(\theta) \rangle$ | G   | B   | G/B    | $\nu$  |
|------------|-----------|--------------|----------|--------------------------------|-----|-----|--------|--------|
| fcc-Au     | 3.708E-2  | 7.472E-2     | 22.67    | 0.4177                         | 24  | 185 | 0.1301 | 0.4376 |
| fcc-Pt     | 5.185E-2  | 9.207E-2     | 24.35    | 0.4526                         | 40  | 247 | 0.1620 | 0.4231 |
| fcc-Pd     | 4.034E-2  | 7.732E-2     | 23.45    | 0.4338                         | 40  | 166 | 0.2391 | 0.3893 |
| fcc-Cu     | 3.824E-2  | 6.423E-2     | 22.95    | 0.4235                         | 39  | 156 | 0.2499 | 0.3847 |
| fcc-Al     | 3.007E-2  | 1.147E-4     | 35.15    | 0.7040                         | 26  | 79  | 0.3319 | 0.3506 |
| fcc-Ir     | 6.300E-2  | 8.789E-2     | 25.90    | 0.4857                         | 218 | 348 | 0.6279 | 0.2404 |
| bcc-Nb     | 4.140E-2  | 5.844E-2     | 22.72    | 0.4188                         | 24  | 174 | 0.1368 | 0.4346 |
| bcc-V      | 4.291E-2  | 6.023E-2     | 21.22    | 0.3884                         | 41  | 184 | 0.2251 | 0.3953 |
| bcc-Ta     | 4.792E-2  | 8.588E-2     | 21.61    | 0.3963                         | 64  | 196 | 0.3262 | 0.3529 |
| bcc-Mo     | 5.423E-2  | 7.932E-2     | 24.67    | 0.4595                         | 125 | 265 | 0.4729 | 0.2958 |
| bcc-W      | 6.054E-2  | 7.371E-1     | 24.10    | 0.4474                         | 151 | 305 | 0.4955 | 0.2874 |
| bcc-Cr     | 5.570E-2  | 7.866E-2     | 24.53    | 0.4564                         | 137 | 256 | 0.5330 | 0.2737 |
| Diamond-Si | 8.340E-2  | -1.240E-2    | 61.45    | 1.8476                         | 63  | 89  | 0.7038 | 0.2150 |
| Diamond    | 2.404E-1  | -5.667E-1    | 48.15    | 1.1164                         | 519 | 434 | 1.195  | 0.073  |
| SiC        | 1.185E-01 | 3.001E-2     | 34.04    | 0.676                          | 187 | 212 | 0.8803 | 0.1597 |
| ZnS        | 6.809E-02 | 8.202E-02    | 28.99    | 0.554                          | 32  | 70  | 0.4562 | 0.3020 |

- 
- <sup>1</sup> Aguayo,A., Murrieta,G.,Coss,R. de. Elastic stability and electronic structure of fcc Ti, Zr, and Hf: a first-principles study. *Phys.Rev.B*,**65**:092106(2002)
- <sup>2</sup> Kamm,G.N.,Alers,G.A. Low-temperature elastic moduli of aluminum.*J.Appl.Phys.* **35**:327(1964)
- <sup>3</sup> Tsuchiya,T.,Kawamura, K., Ab initio study of pressure effect on elastic properties of crystalline Au.*J.Chem.Phys.*, **16**,1(2002)
- <sup>4</sup> Lazarus,D., The variation of the adiabatic elastic constants of KCl, NaCl,CuZn,Cu,and Al with pressure to 10,000 bars. *Phys.Rev.*, **76**: 545(1949)
- <sup>5</sup> Chen, K.Y., Zhao, L.R. and Tse, J.S. Ab initio study of elastic properties of Ir and Ir<sub>3</sub>X compounds. *J.Appl.Phys.*,**93**:2414-2417(2003)
- <sup>6</sup> Kamran, S. and Chen, K. and Chen, L. Ab initio examination of ductility features of fcc metals. *Phys.Rev.B*,**79**,024106(2009) and reference therein.
- <sup>7</sup> Duesbery,M.S. and Vitek,V. Plastic anisotropy in bcc transition metals. *ActaMater.*,**46**,1481(1998).
- <sup>8</sup> Olsson, P.T.,Semi-empirical atomistic study of point defect properties in BCC transition metals. *Comput.Mater.Sci.*, **47**: 135-145(2009)
- <sup>9</sup> Palmer, S.B. and Lee, E.W. The elastic constants of chromium.*Philos.Mag.*,**24**,311(1971).
- <sup>10</sup> Rasky, D. J. and Milstein, F. Pseudopotential theoretical study of the alkali metals under arbitrary pressure: Density, bulk modulus, and shear moduli. *Phys.Rev.B*, **33**: 27651(1986)
- <sup>11</sup> McSkimin,H. Andreach Jr, P,Elastic moduli of diamond as a function of pressure and temperature.*J.Appl.Phys.*, **43**:2944-2948(1972).
- <sup>12</sup> Clerc,D.G. Ledbetter, H., Second-order and third-order elastic properties of diamond: An ab initio study. *J.Phys.Chem.Solid*,**66**:1589(2005).
- <sup>13</sup> Straumanis,M.E.,Aka, E.Z, Lattice parameters, coefficients of thermal expansion, and atomic weights of purest silicon and germanium.*J.Appl.Phys.*,**23**:330-334(1952).
- <sup>14</sup> Feldman,D.W.,Parker,J.H. Jr., Choyke, J.W., Patrick,L. *Phys.Rev.* **173**, 787 (1968).
- <sup>15</sup> Lambrecht, WRL and Segall, B and Methfessel, Michael and Van Schilfgaarde, M,*Phys.Rev.B* **44**, 3685(1991).
- <sup>16</sup> Sherwin, M.E, Drummond, T.J. Predicted elastic constants and critical layer thicknesses for cubic phase AlN, GaN, and InN on  $\beta$ -SiC. *J.Appl.Phys.*,**69**,8423 (1991)
- <sup>17</sup> E. Soignard, M. Somayazulu, J. Dong, O. F. Sankey, P. F. McMillan. High pressure Chigh temperature synthesis and elasticity of the cubic nitride spinel  $\gamma$ -Si<sub>3</sub>N<sub>4</sub>. *J.Phys. : Condens.Matter*,**13**,557-563(2001) and reference therein.
- <sup>18</sup> Papadimitriou,I.,Utton, C., Tsakiroopoulos,P. Ab initio investigation of the intermetallics in the Nb`CSn binary system. *ActaMater.*,**86**,23(2015).
- <sup>19</sup> Chen, K. and Zhao, L.R., Rodgers, J. and John, S.T. Alloying effects on elastic properties of TiN-based nitrides. *J.Phys.D : Appl.Phys.*,**36**,2725-2729(2003) and reference therein.
- <sup>20</sup> Duan,Y.H., Huang, B., Sun,Y., Peng,M.J.,Zhou,S.G. Stability, elastic properties and electronic structures of the stable Zr`CAL intermetallic compounds: A first-principles investigation. *J.AlloysComp.*,**590**,50-60(2014).
- <sup>21</sup> Hu, J., Xie, M.,Pan, Y., Yang, Y., Liu, M., Zhang, J. The electronic, elastic and structural properties of Pd–Zr intermetallic. *Comput.Mater.Sci.*,**51**,1-6(2012).
- <sup>22</sup> Kinoshita,H. ,Hamaya,N., Fujisawa,H.,Elastic properties of single-crystal NaCl under high pressures to 80 kbar. *J.Phys.Earth*,**27**:337-350 (1979).
- <sup>23</sup> Lewis, J.T, Lehoczky, A.O. and Briscoe, C.V. Elastic constants of the alkali halides at 4.2K. *Phys.Rev.* **161**:877 (1967).
- <sup>24</sup> Liu,Q. and He,Q. Elastic Constants of Mantle Minerals at High Temperature. *Int.JThermophys* **29**:1491 (2008).
- <sup>25</sup> Vijay, A and Verma, T.S. Analysis of temperature dependence of elastic constants and bulk modulus for ionic solids. *Phys.B : Conden.Matter* **291**:373 (2000).
- <sup>26</sup> Sudha Priyanga, G. and Asvini Meenaatci,A.T. and Rajeswara Palanichamy,R. and Iyakutti,K. Structural, electronic and elastic properties of alkali hydrides (MH: M = Li, Na, K, Rb, Cs): Ab initio study. *Comput.Mater.Sci.* **84**:206 (2014).
- <sup>27</sup> Rand, S. C. and Rao, B. S. and Enright, G. D. and Stoicheff, B. P.Differing values of the elastic constants of xenon determined by Brillouin and neutron scattering. *Phys.Rev.B* **15**:2352(1977).
- <sup>28</sup> Gewurtz, S. and Kieffe, H. and Landheer, D. and McLaren, R. A. and Stoicheff, B. P. Elastic Constants of Argon and Neon by Brillouin Scattering from Single Crystals near Their Triple Points.*Phys.Rev.Lett.* **29**:1454(1972).
- <sup>29</sup> Gewurtz, S. and Stoicheff, B. P. Elastic constants of argon single crystals determined by Brillouin scattering.*Phys.Rev.* **10**:3487(1974).
- <sup>30</sup> Grimsditch, M. and Loubeyre, P. and Polian, A.Brillouin scattering and three-body forces in argon at high pressures.*Phys.Rev.B* **33**:7192(1986).
- <sup>31</sup> Skalyo, J. and Endoh, Y. and Shirane, G. Inelastic neutron scattering from solid krypton at 10 K. *Phys.Rev.B* **9**:1797(1974).
- <sup>32</sup> Kato, Y.and Stoicheff, B. P.Absolute intensity measurements of Brillouin spectra of liquid and solid krypton, and determination of the elasto-optic constants. *Phys.Rev.B* **11**:3984(1975).
- <sup>33</sup> Polian, A. and Besson, J. M. and Grimsditch, M. and Grosshans, W. A. Solid krypton: Equation of state and elastic properties. *Phys.Rev.B* **39**:1332(1989).
- <sup>34</sup> Lurie, N. A. and Shirane, G. and Skalyo, J. Phonon dispersion relations in xenon at 10 K.*Phys.Rev.B* **9**:5300(1974) and references therein.
- <sup>35</sup> Gornall, W.S. and Stoicheff, B.P. Determination of the elastic constants of xenon single crystals by Brillouin scattering.*Phys.Rev.B* **4**:4518(1971).
- <sup>36</sup> Sasaki, S.and Wada, N. and Kume, T. and Shimizu, H.High-pressure Brillouin study of the elastic properties of rare-gas solid xenon at pressures up to 45 GPa. *J.RamanS pectr.* **40**:121(2009).
- <sup>37</sup> Taga, A and Vitos, Levente and Johansson, Börje and Grimvall, G. Ab initio calculation of the elastic properties of Al<sub>1-x</sub>Li<sub>x</sub>≤0.20 random alloys. *Phys.Rev.B* **71**:014201(2005).
- <sup>38</sup> Zhang, Hualei and Johansson, Börje and Vitos, Levente Ab initio calculations of elastic properties of bcc Fe-Mg and Fe-Cr random alloys.

- Phys.Rev.B* **71**:014201(2009).
- <sup>39</sup> Tian, F. and Delczeg, L. and Chen, N. and Varga, L. and Shen, J. and Vitos, L. Ab initio investigation of high-entropy alloys of 3 d elements. *Phys.Rev.B* **87**:075144(2013).
- <sup>40</sup> Kandil, HM and Greiner, JD and Smith, JF. Single-Crystal Elastic Constants of Ytria-Stabilized Zirconia in the Range 20 to 700 °C. *J.Am.CeramicSoc.* **67**:341(1984).
- <sup>41</sup> Yoo,M.H. and Koeppe,M. and Hartig,C. and Mecking,H. and Hermann,W. and Sockel,H.-G. Effect of temperature on elastic constants and dislocation properties of Fe30% Al single crystals. *ActaMater.* **45**:4323(1997).
- <sup>42</sup> Isaak, D. G. and Anderson, O. L. and Goto, T. Measured elastic moduli of single-crystal MgO up to 1800 K. *Phys.Chem.Minerals* **16**:704(1989).
- <sup>43</sup> Oda, H. and Anderson, O. L. and Isaak, Donald G. and Suzuki, I. Measurement of elastic properties of single-crystal CaO up to 1200 K.*Phys.Chem.Minerals*, **19**,96(1992)
- <sup>44</sup> Jamal,M., Sarvestani,N.K.,Yazdanic, A., Reshak,A.H., Mechanical and thermodynamical properties of hexagonal compounds at optimized lattice parameters from two-dimensional search of the equation of state. *RS CADv.*, **4**: 57903(2014) and refernce therein.
- <sup>45</sup> Massalski,T.B. Binary Alloy Phase Diagrams, ASM, Materials Park, 1990.
- <sup>46</sup> Wright, A.F. Elastic properties of zinc-blende and wurtzite AlN, GaN, and InN. *J.Appl.Phys.*,**82**,2833 (1977) and reference therein.
- <sup>47</sup> Bannikov, V. V and Shein, I.R. and Ivanovskii, A.L. Elastic and electronic properties of hexagonal rhenium sub-nitrides Re<sub>3</sub>N and Re<sub>2</sub>N in comparison with hcp-Re and wurtzite-like rhenium mononitride ReN. *Phys.StatusSolidiB*,**248**,1369(2011).
- <sup>48</sup> Fan, C. and Wang, Q. and Li, L. and Zhang, S. and Zhu, Y. and Zhang, X. and Ma, M. and Liu, R. and Wang, W. Bulk moduli of wurtzite, zinc-blende, and rocksalt phases of ZnO from chemical bond method and density functional theory. *Appl.Phys.Lett.*,**92**,101917(2008).
- <sup>49</sup> Thomas, PJ and Rand, SC and Stoicheff, B.P. Elastic constants of parahydrogen determined by Brillouin scattering. *CanadianJ.Phys.*,**56**,1494(1978).
- <sup>50</sup> R.A. Casali, J. Lasave, M.A. Caravaca, S. Koval, C.A. Ponce, R.L. Migoni. Ab-initio and shell model studies of structural, thermoelastic and vibrational properties of SnO<sub>2</sub> under pressure. *J.Phys. : Condens.Matter*,**25**,135404 (2013) and reference therein.
- <sup>51</sup> T. Yao, Y. Wang,H. Li,J. Lian, J. Zhang,H. Gou. A universal trend of structural, mechanical and electronic properties in transition metal (M = V, Nb, and Ta) borides: First-principle calculations. *Comput.Mater.Sci.*,**65**,302(2012).
- <sup>52</sup> Wei, PY and Sun, Y and Chen, X-Q and Li, DZ and Li, YY. Anisotropy in electronic, optical, and mechanical properties of superhard body-centered tetragonal C<sub>4</sub> phase of carbon. *Appl.Phys.Lett.*,**97**,061910(2010).
- <sup>53</sup> Bai, X., Li, J.H., Dai, Y.,Liu, B.X. Structural and elastic properties of Pd-Zr compounds studied by ab initio calculation. *Intermetallics*,**31**,79-87(2012).
- <sup>54</sup> Tanaka, K. and Inui, H and Yamaguchi, M and Koiwa, M. Directional atomic bonds in MoSi<sub>2</sub> and other transition-metal disilicides with the C11 b, C40 and C54 structures. *Mater.Sci.Eng. : A*,**261**,158(1999).
- <sup>55</sup> Tanaka, K and Nawata, K and Inui, H and Yamaguchi, M and Koiwa, M. Temperature dependence of single-crystal elastic constants of Mo(Si, Al)<sub>2</sub>. *Intermetallics*,**6**,607(1998).
- <sup>56</sup> Caravaca, M.A. and Mino, J.C. and Pérez, V.J. and Casali, R.A., Ponce, C.A. Ab initio study of the elastic properties of single and polycrystal TiO<sub>2</sub>, ZrO<sub>2</sub> and HfO<sub>2</sub> in the cotunnite structure. *J.Phys. : Condens.Matter*,**21**,015501(2009).
- <sup>57</sup> Y. Gou and Z. Fu and Y. Liang and Z. Zhong and S. Wang. Electronic structures and mechanical properties of iron borides from first principles. *SolidStateCommun.*,**187**,28(2014).
- <sup>58</sup> Panda, K.B. and Chandran, K.S.R. First principles determination of elastic constants and chemical bonding of titanium boride (TiB) on the basis of density functional theory. *ActaMater.*,**54**,1641(2006).
- <sup>59</sup> Ikehata, H. and Nagasako, N. and Furuta, T. and Fukumoto, A. and Miwa, K. and Saito, T. First-principles calculations for development of low elastic modulus Ti alloys. *Phys.Rev.B*,**70**,174113(2004).
- <sup>60</sup> Chang, Y. A. and Himmel, L. Temperature Dependence of the Elastic Constants of Cu, Ag, and Au above Room Temperature. *J.Appl.Phys.*,**37**,3567(1966).
- <sup>61</sup> Ledbetter, H.M, Moment, R.L. Elastic properties of face-centered-cubic plutonium. *ActaMetall.*,**24**,891(1976).
- <sup>62</sup> Beeler, B., Deo, C., Baskes, M., Okuniewski, M. First principles calculations of the structure and elastic constants of  $\alpha$ ,  $\beta$  and  $\gamma$  uranium. *J.Nucl.Mater.*,**433**,143-151(2013).
- <sup>63</sup> Zhang,C., Jiang,H.,Shi,H., Zhong, G.,Su, Y. Mechanical and thermodynamic properties of  $\alpha$ -UH<sub>3</sub> under pressure. *J.AlloysComp.*,**604**,171-174(2014).
- <sup>64</sup> Zhang, Y., Wang, B., Lu, Y., Yang, Y., Zhang, P. Electronic, mechanical and thermodynamic properties of  $\alpha$ -UH<sub>3</sub>: A comparative study by using the LDA and LDA+U approaches. *J.Nucl.Mater.*,**430**,137-141(2012).
- <sup>65</sup> Salleh,M.D., Macdonald,J.E., Saunders,G.A, Plessis,P.D.V.D. Hydrostatic pressure dependences of elastic constants and vibrational anharmonicity of uranium nitride. *J.Mater.Sci.*,**406**,218-222(1986).
- <sup>66</sup> Shibata,H.,Tsuru, T., Hirata, M.,Kaji, Y. First principles study on elastic properties and phase transition of NpN. *J.Nucl.Mater.*,**401**,113-117(2010).
- <sup>67</sup> Lu, Y., Wang, B., Li, R., Shi, H., Zhang, P. Structural, electronic, mechanical, and thermodynamic properties of UN<sub>2</sub>: Systematic density functional calculations. *J.Nucl.Mater.*,**410**,46-51(2011).
- <sup>68</sup> Mei, Z. and Stan, M.,Yang, J. First-principles study of thermophysical properties of uranium dioxide. *J.AlloysComp.*,**603**,282-286(2014).
- <sup>69</sup> Hutchings, M. T. High-temperature studies of UO<sub>2</sub> and ThO<sub>2</sub> using neutron scattering techniques. *J.Chem.SOC., FuruduyTrans.*,**83**,1083(1987).
- <sup>70</sup> Shi, H., Zhang, P., Li, S., Sun, B., Wang, B. Electronic structures and mechanical properties of uranium monocarbide from first-principles LDA+U and GGA+U calculations. *Phys.Lett.A.*,**373**,3577-3581(2009).
- <sup>71</sup> Shi, H., Zhang, P., Li, S., Wang, B,Sun, B. First-principles study of UC<sub>2</sub> and U<sub>2</sub>C<sub>3</sub>. *J.Nucl.Mater.*,**396**,218-222(2010).
- <sup>72</sup> Yang, J., Gao, T., Liu, B., Sun, G., Chen, B. Elastic anisotropy, vibrational, and thermodynamic properties of U<sub>2</sub>Ti intermetallic compound with A1B2-type structure under high pressure up to 100 GPa. *J.Appl.Phys.*,**117**,125903(2015) and reference therein.



- <sup>73</sup> Sudha Priyanga, G., Rajeswarapalanichamy, R., Iyakutti, K. First principles study of structural, electronic, elastic and magnetic properties of cerium and praseodymium hydrogen system  $REH_x$  (RE: Ce, Pr and  $x=2, 3$ ). *J.RareEarths*, **33**, 289 (2015) and reference therein.
- <sup>74</sup> Korozlu, N., Colakoglu, K., Deligoz, E., Aydin, S. The elastic and mechanical properties of MB 12 (M= Zr, Hf, Y, Lu) as a function of pressure. *J.AlloysComp.*, **546**, 157-164 (2013).
- <sup>75</sup> He, Y and Schwarz, RB and Darling, T and Hundley, M and Whang, SH and Wang, ZM. Elastic constants and thermal expansion of single crystal  $\gamma$ -TiAl from 300 to 750 K. *Mater.Sci.Eng. : A*, **239**, 157-163 (1997).
- <sup>76</sup> Bhat, S. S. and Waghmare, U. V. and Ramamurty, U. Effect of oxygen vacancies on the elastic properties of zinc oxide: A first-principles investigation. *Comput.Mater.Sci.*, **239**, 157-163 (2015).
- <sup>77</sup> Pan, Y. and Zheng, W.T. and Guan, W.M. and Zhang, K.H. and Yu, S.S. and Hu, X.Y. Effect of boron vacancies on mechanical properties of  $ReB_2$  from first-principles calculation. *Comput.Mater.Sci.*, **82**, 12-16 (2014).
- <sup>78</sup> Sun, J.P. and Song, Y. and Wen, G.W. and Wang, Y. and Yang, R. Softening of hydroxyapatite by vacancies: a first principles investigation. *Mater.Sci.Eng.C*, **33**, 1109 (2013).
- <sup>79</sup> Wen, M and Barnoush, A and Yokogawa, K. Calculation of all cubic single-crystal elastic constants from single atomistic simulation: Hydrogen effect and elastic constants of nickel. *Comput.Phys.Comm.*, **182**, 1621 (2011).
- <sup>80</sup> Li, Z. and Grimsditch, M. and Xu, X. and Chan, S. -K. The elastic, piezoelectric and dielectric constants of tetragonal  $PbTiO_3$  single crystals. *Ferroelectrics*, **141**, 313-325 (1993).
- <sup>81</sup> Fisher, E. S. and Renken, C. J. Single-Crystal Elastic Moduli and the hcp to bcc Transformation in Ti, Zr, and Hf. *Phys.Rev.*, **135**, A482 (1964).
- <sup>82</sup> Ledbetter, H. and Ogi, H. and Kai, S. and Kim, S. and Hirao, M. Elastic constants of body-centered-cubic titanium monocrystals. *J.Appl.Phys.*, **95**, 4642 (2004).
- <sup>83</sup> W.Weber, Phys. Rev. B **85**082 (1973).
- <sup>84</sup> Scabarozzi, T. H. and Amini, S. and Finkel, P. and Leaffer, O. D. and Spanier, J. E. and Barsoum, M. W. and Drulis, M. and Drulis, H. and Tambussi, W. M. and Hettinger, J. D. and Lofland, S. E. *J.Appl.Phys.*, **104**, 033502 (2008).
- <sup>85</sup> Yu, R. and Zhang, X. F. and He, L. L. and Ye, H. Q. Topology of charge density and elastic anisotropy of  $Ti_3SiC_2$  polymorphs. *J.Mater.Res.*, **20**, 1180 (2004).
- <sup>86</sup> Ledbetter, H.M. Monocrystal-Polycrystal Elastic Constants of a Stainless Steel *Phys.Stat.Sol.(a)*, **85**, 89 (1984) and references therein.
- <sup>87</sup> Teklu, A. and Ledbetter, H. and Kim, S. and Boatner, L.A. and McGuire, M. and Keppens, V. Single-crystal elastic constants of Fe-15Ni-15Cr alloy. *Metall.Mater.Trans.A*, **35**, 3149 (2004).
- <sup>88</sup> Khazaei, M. and Arai, M. and Sasaki, T. and Estili, M. and Sakka, Y. Trends in electronic structures and structural properties of MAX phases: a first-principles study on  $M_2AlC$  (M = Sc, Ti, Cr, Zr, Nb, Mo, Hf, or Ta),  $M_2AlN$ , and hypothetical  $M_2AlB$  phases. *J.Phys. : Condens.Matter* **26** 505503 (2014).
- <sup>89</sup> He, Xiaodong and Bai, Yuelel and Zhu, Chuncheng and Sun, Yue and Li, Mingwei and Barsoum, M.W. General trends in the structural, electronic and elastic properties of the  $M_3AlC_2$  phases (M = transition metal): A first-principle study *Comput.Mater.Sci.*, **49**, 691 (2010).
- <sup>90</sup> Bai, Yuelel and He, Xiaodong and Sun, Yue and Zhu, Chuncheng and Li, Mingwei and Shi, Liping. Chemical bonding and elastic properties of  $Ti_3AC_2$  phases (A= Si, Ge, and Sn): A first-principle study *SolidStateSci.*, **12**, 1220 (2010).
- <sup>91</sup> Bouhemadou, A. Calculated structural, electronic and elastic properties of  $M_2GeC$  (M= Ti, V, Cr, Zr, Nb, Mo, Hf, Ta and W). *Appl.Phys.A.*, **96**, 959 (2009).
- <sup>92</sup> Bouhemadou, A and Khenata, R. Prediction study of structural and elastic properties under the pressure effect of  $M_2GaC$  (M= Ti, V, Nb, Ta). *J.Appl.Phys.A.*, **102**, 043528 (2007).
- <sup>93</sup> Alers, G.A. Elastic moduli of vanadium *Phys.Rev.*, **119**, 1532 (1960).
- <sup>94</sup> Anderson, C. E. and Brotzen, F. R. Elastic constants of tantalum-tungsten alloys. *J.Appl.Phys.*, **53**, 292 (1982).
- <sup>95</sup> Bolef, D.I. and Smith, R.E. and Miller, J.G. Elastic properties of vanadium. I. Temperature dependence of the elastic constants and the thermal expansion. *Phys.Rev.B*, **3**, 4100 (1971).
- <sup>96</sup> Li, X. and Zhang, H. and Lu, S. and Li, W. and Zhao, J. n and Johansson, B. and Vitos, L. *Phys.Rev.B*, **86**, 014105 (1971).
- <sup>97</sup> Wang, X. and Liu, L.B. and Wang, M.F. and Shi, X. and Huang, G.X. and Zhang, L.G. Computational modeling of elastic constants as a function of temperature and composition in  $Zr$ - $Cr$ - $Nb$  alloys. *Calphad*, **48**, 89 (2015) and references therein.
- <sup>98</sup> De Camargo, P.C. and Brotzen, F.R. Elastic constants of antiferromagnetic chromium-vanadium alloys. *J.Mag.Mag.Mater.*, **27**, 65 (1982).
